# Mechanical Feedback and Robustness of Apical Constrictions in *Drosophila* Embryo Ventral Furrow Formation

Michael C. Holcomb<sup>1†</sup>, Guo-Jie Jason Gao<sup>2</sup>, Mahsa Servati<sup>1‡</sup>, Dylan Schneider<sup>3</sup>, Presley K. McNeely<sup>1</sup>, Jeffrey H. Thomas<sup>4\*</sup>, Jerzy Blawdziewicz<sup>1,3\*</sup>

**\*For correspondence:**

[jerzy.blawdziewicz@ttu.edu](mailto:jerzy.blawdziewicz@ttu.edu) (JB);  
[jeffrey.thomas@ttuhsc.edu](mailto:jeffrey.thomas@ttuhsc.edu) (JHT)

**Present address:** <sup>†</sup>Department of Physics and Geosciences, Angelo State University, 2601 W. Avenue N, San Angelo, TX 76909, USA; <sup>‡</sup>School of Health Sciences, Purdue University, 550 Stadium Mall Dr., West Lafayette, IN 47907, USA

<sup>1</sup>Department of Physics and Astronomy, Texas Tech University, Box 41051, Lubbock, TX 79409-1051, USA; <sup>2</sup>Department of Mathematical and Systems Engineering, Shizuoka University, Hamamatsu, Shizuoka 432-8561, Japan; <sup>3</sup>Department of Mechanical Engineering, Texas Tech University, Box 41021, Lubbock, TX 79409-1021, USA; <sup>4</sup>Department of Cell Biology and Biochemistry, Texas Tech University Health Sciences Center, Mail Stop 6540, Lubbock, TX 79430, USA

**Abstract** The key process giving rise to ventral furrow formation (VFF) in the *Drosophila* embryo is apical (outer side) constriction of cells in the ventral region. A combined effect of the cellular constrictions is a negative spontaneous curvature of the cell layer, which buckles inwards. In our recent paper [Gao et al. (2016). *J Phys Condens Matter*, 28(41), 414021] we showed that the cell constrictions in the initial phase of VFF produce well-defined cellular constriction chain (CCC) patterns, and we argued that CCC formation is a signature of mechanical signaling that coordinates apical constrictions through tensile stress. In the present study, we provide a statistical comparison between our active granular fluid (AGF) model and time lapses of live embryos. We also demonstrate that CCCs can penetrate regions of reduced constriction probability, and we argue that CCC formation increases robustness of VFF to spatial variation of cell contractility.

## Introduction

Previous research efforts to understand morphogenesis have primarily focused on the identification of genetic information and biochemical signals involved in formation of embryonic architecture. In recent years, however, there has emerged compelling evidence that cell communication via mechanical forces is crucial in orchestrating morphogenetic processes (*Mammoto and Ingber, 2010; Zhang and Labouesse, 2012; Miller and Davidson, 2013; Chanet and Martin, 2014; Heer and Martin, 2017; Hunter and Fernandez-Gonzalez, 2017; Gilmour et al., 2017; Ladoux and Mége, 2017*). In *Drosophila* gastrulation, mechanical signaling has been shown to be a triggering mechanism for morphogenetic events (*Farge, 2003; Brouzés and Farge, 2004; Pouille et al., 2009; Mitrossilis et al., 2017; Weng and Wieschaus, 2016*), and mechanical feedback to be a factor in the coordination of cellular activities in mesoderm primordium (*Gao et al., 2016*). Mechanical feedback is also involved in remodeling subcellular components such as adherens junctions (*Weng and Wieschaus, 2016*) and the supracellular actomyosin meshwork (*Chanet et al., 2017*).

To elucidate the role of mechanical forces and mechanical feedback in embryonic development,

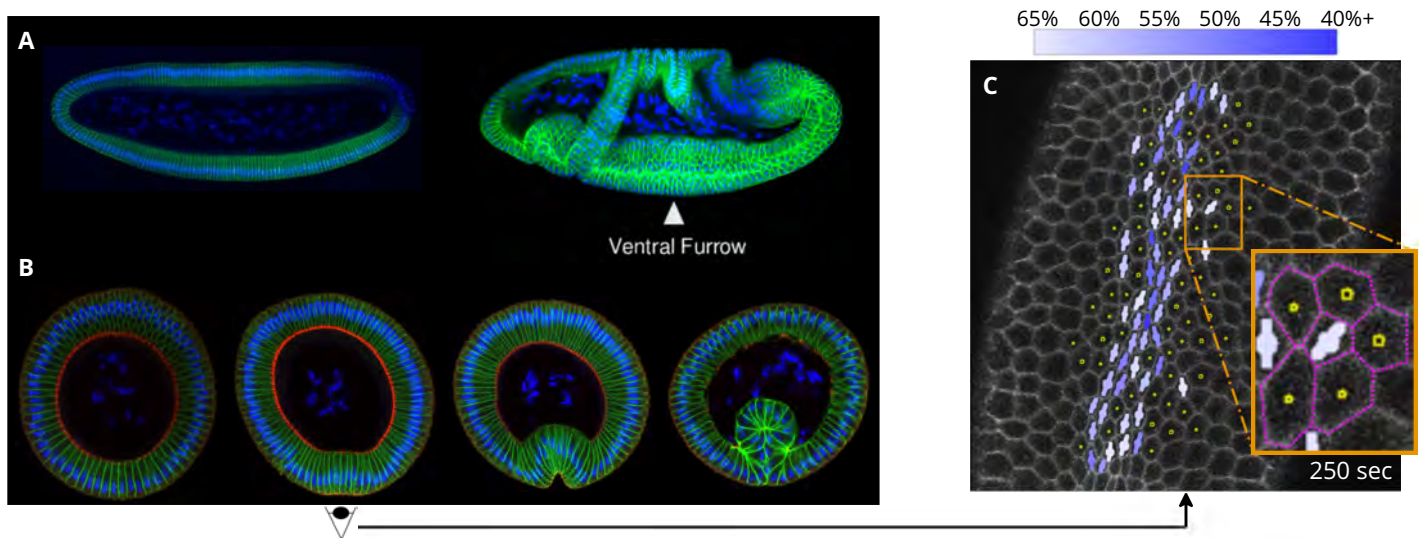

**Figure 1. VFF in the *Drosophila* embryo.** (A) The embryo before and after gastrulation; position of the ventral furrow is indicated. (B) Cross-sectional images of fixed embryos, showing the progression of VFF. (C) Processed confocal microscopy image of a live Spider-GFP embryo towards the end of the initial slow apical constriction phase of VFF. Constricted cells are indicated by a bar with a circle (bar-circle), where the bar represents the direction and length of the major cell axis, and the size of the circle is proportional to the cell area. Color saturation indicates the degree of constriction, measured by the reduction of the cells minor axis length relative to the reference value (as defined in Equation 1 and indicated by the color bar). Tracked cells are indicated by the dots. In A, B embryos were heat-methanol fixed, stained with Hoeschst (blue), antibodies to Neurotactin (green), and antibodies to Zipper (myosin heavy chain, red); the images were acquired by confocal microscopy.

39 we have recently analyzed the dynamics of the apical constriction process during the earliest stage  
40 of ventral furrow formation (VFF) in the *Drosophila* embryo (Gao et al., 2016). During this process,  
41 the apical (outer) sides of cells in the ventral region constrict, producing negative spontaneous  
42 curvature of the cell layer. Subsequently, the layer buckles inwards as the result of the constriction-  
43 induced bending stresses (see Figure 1 for relevant details of *Drosophila* gastrulation).

44 Our study (Gao et al., 2016) showed that cell constrictions during the initial slow phase of VFF are  
45 not random uncorrelated events as previously assumed (Sweeton et al., 1991). Instead, constricted  
46 cell apices form well-defined correlated structures which we termed cellular constriction chains  
47 (CCCs). Formation of CCCs (see the highlighted cells in Figure 1C, Figure 2 and Figure 3) implies  
48 the existence of strong spatial and directional correlations between the constriction events. Xie  
49 and Martin (2015) also published evidence that pulsed apical constrictions were not random but  
50 correlated with neighboring cells.

51 Based on a qualitative analysis of geometrical patterns of CCCs, we proposed (Gao et al., 2016)  
52 that CCCs originate from communication between cells via mechanical feedback. To explain this  
53 mechanism of CCC formation we have developed a theoretical active granular fluid (AGF) model of  
54 the apical surface of the cell monolayer. In this model, the cells (more specifically, their mechanically  
55 active apical ends) are treated as mechanically sensitive interacting particles undergoing a stochastic  
56 constriction process. The model predicts that if cells react to tensile stress by increasing apical-  
57 constriction probability, the constricted cells tend to form chain-like structures similar to CCCs  
58 observed *in vivo*.

59 In the present paper, we use the AGF model and live embryo data to quantitatively analyze  
60 constriction patterns observed in mesoderm primordium in *Drosophila* embryos. Our aim is twofold.  
61 First, we determine statistical features of constricted-cell clusters that can quantitatively distinguish  
62 between purely random uncorrelated constriction patterns and those resulting from constrictions  
63 correlated by tensile stress. These statistical characteristics, identified using the AGF model, are  
64 applied to live embryo data, providing a clear indication that tensile mechanical feedback is an  
65 important controlling factor involved in the initial slow phase of apical constrictions during VFF.

66 Second, to shed light on the biological function of mechanical feedback between constricting  
67 cells, we investigate the cellular constriction process in systems with zones of reduced cell capability  
68 to constrict. Our AGF simulations demonstrate that coordination of apical constrictions by tensile  
69 stress allows CCCs to penetrate or bypass regions of reduced constriction probability, thus rescuing  
70 the constriction process. An analysis of constriction patterns in live embryos in which contractile  
71 force transmission has locally been reduced using optogenetic techniques (*Guglielmi et al., 2015*)  
72 is consistent with our theoretical findings. We thus conclude that mechanical feedback and the  
73 associated formation of CCCs aid robustness of the VFF process in the presence of environmental  
74 or genetic fluctuations.

## 75 Results

### 76 Confocal images of the ventral surface of live Spider-GFP embryos show CCCs emerg- 77 ing during the initial slow phase of VFF

78 Gastrulation in *Drosophila* occurs through a progression of partially concurrent morphogenetic  
79 movements that result in the emergence of a complex embryonic architecture depicted in *Fig-*  
80 *ure 1A*. These movements are generated by coordinated activities of nearly identical cells in distinct  
81 genetically specified regions established at the early stage of embryonic development as a result  
82 of a cascading biochemical pattern formation process (*St Johnston and Nüsslein-Volhard, 1992;*  
83 *Riechmann and Ephrussi, 2001; Huynh and St Johnston, 2004; van Eeden and St Johnston, 1999*).

84 Here we focus on VFF, the earliest morphogenetic movement in *Drosophila* gastrulation. The VFF  
85 process is driven by apical constrictions of cells in the mesoderm primordium, i.e., the band of cells  
86 in the ventral region of the embryo that will subsequently undergo epithelial invagination (see the  
87 schematic shown in *Figure 4A*). These cells are capable of mechanical activity due to expression of  
88 regulatory genes *twist* and *snail* (*Leptin and Grunewald, 1990; Leptin, 1991; Ip et al., 1994; Seher*  
89 *et al., 2007; Martin et al., 2009; Pouille et al., 2009*). Our study addresses the question whether,  
90 beyond genetic regulation, the mesoderm primordium cells communicate via mechanical feedback  
91 to coordinate their activities during the VFF process.

92 As illustrated in *Figure 1B,C*, several distinct VFF phases can be distinguished (*Sweeton et al.,*  
93 *1991*): (1) The early slow phase during which a growing number of mesoderm primordium cells  
94 undergo apical constrictions; (2) the fast transition phase, where the remaining cells undergo  
95 apical constrictions at the onset of buckling of the cell layer; and (3) the invagination phase during  
96 which the ventral furrow forms. The shift from the slow phase of VFF to the fast phase and the  
97 subsequent invagination occurs when approximately 40% of cells in the mesoderm primordium  
98 have constricted. CCCs emerge during the slow phase (1).

99 Constriction patterns visualized using minor axis length to identify constricted cells  
100 Development of CCC patterns on the apical surface of the mesoderm primordium is depicted in  
101 the confocal images of live Spider-GFP embryos shown in *Figure 1C*, *Figure 2*, and *Figure 3*. We  
102 observed that constriction along the minor axis of the cell apex was the critical parameter of  
103 apical constriction based on the geometry of the cells. This observation is consistent with the  
104 dorsal-ventral (ventral-lateral) bias in apical constriction previously observed (*Martin, 2010; Heer*  
105 *et al., 2017*). In these images, the cells are marked as constricted based on their minor axis length  
106 (MAL) reduction relative to the reference MAL,

$$r = \lambda / \lambda_{\text{ref}}. \quad (1)$$

107 Here  $\lambda$  is the MAL of a given cell, and  $\lambda_{\text{ref}}$  is its reference value established for each individual cell by  
108 averaging over twenty sequential frames before constrictions begin. In *Figure 2*, cells are marked  
109 as constricted if their MAL drops below 65% of their reference MAL (i.e., when  $r < 0.65 = r_c$ ). The  
110 distribution of the MAL reduction values in the last frame of *Figure 2* is depicted in *Figure 1C*, and  
111 constriction patterns for different values of the cutoff parameter  $r_c$  are presented in *Figure 3*.

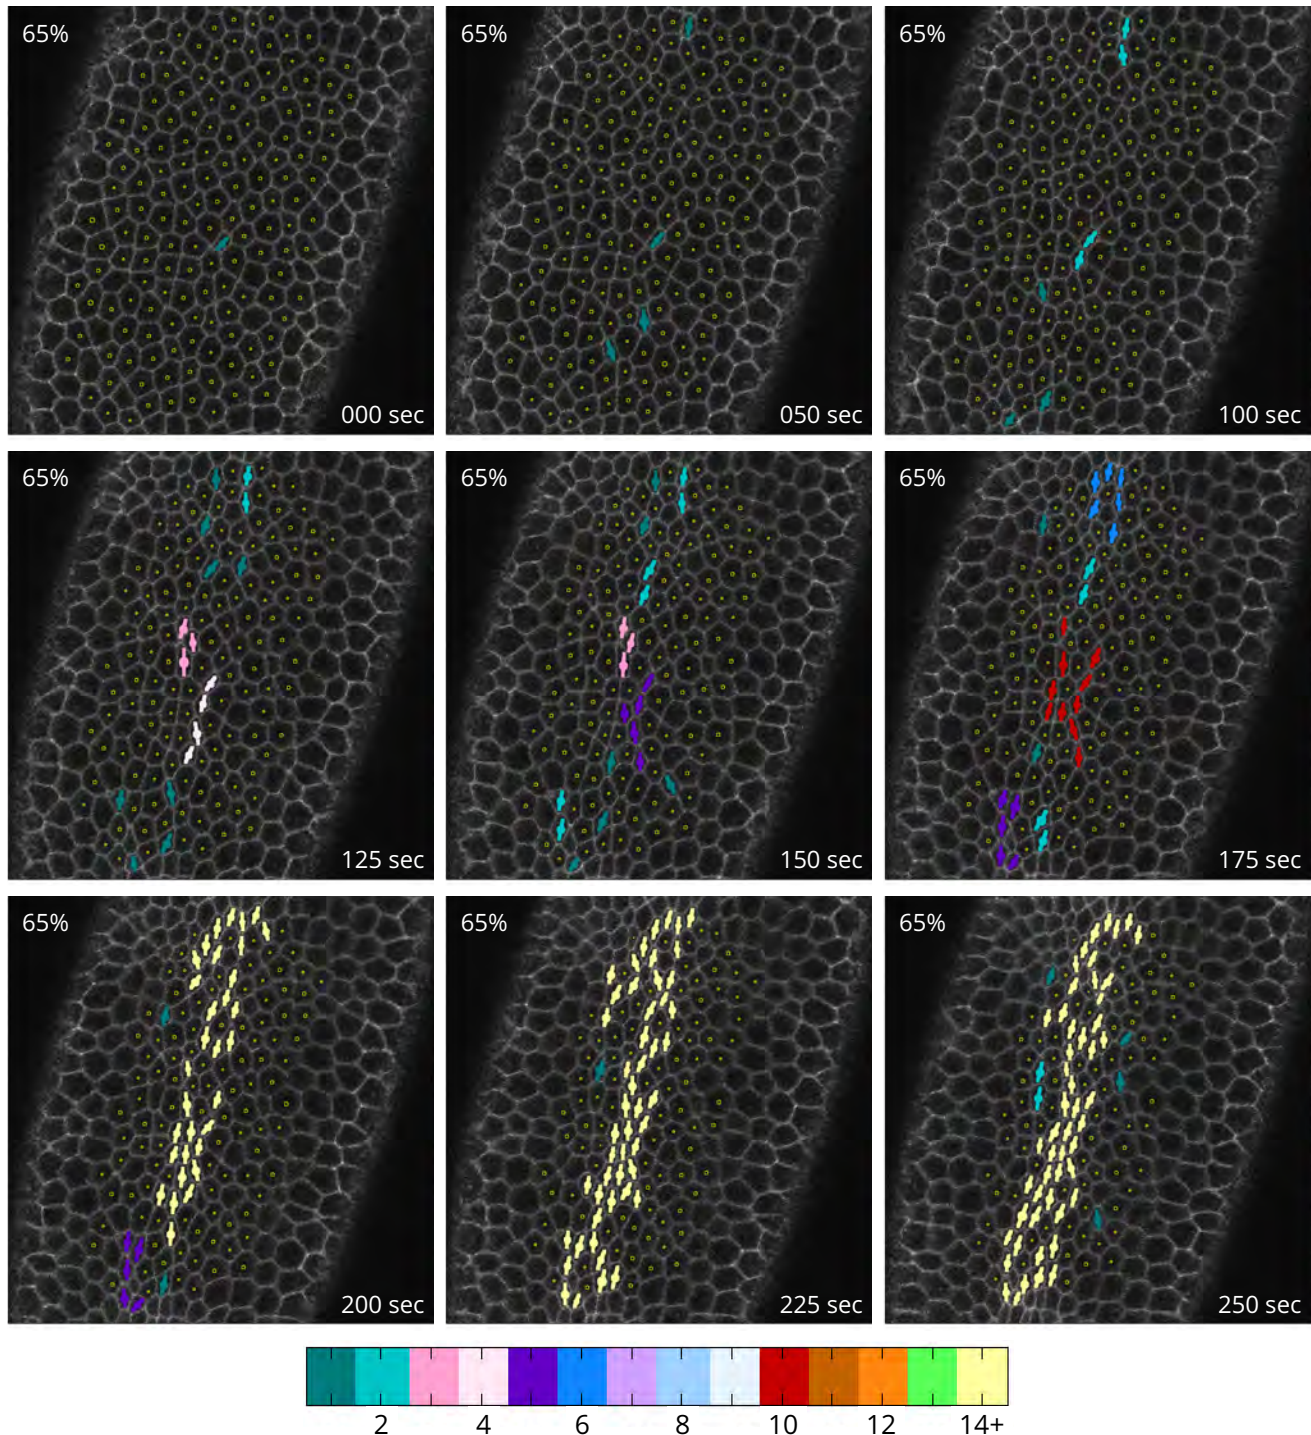

**Figure 2. Development of CCCs during the slow apical constriction phase of VFF.** The constricted cells in the processed confocal microscopy time lapse images of the underside of a Spider-GFP are marked based on the MAL reduction cutoff value ( $r_c$ ) of 0.65. The symbols follow the same convention as the one used in *Figure 1*, except that the colors indicate the number of cells, interconnected via shared neighbors, belonging to a single constricted-cell cluster. Cells initially constrict alone, forming singlets; however, they quickly begin to develop elongated chain-like structures, i.e., CCCs. The CCCs grow rapidly and interconnect, eventually forming a network that percolates across the mesoderm primordium along the anteroposterior axis. Many of the marked cells remain constricted across multiple frames, indicating that they are undergoing ratcheted constrictions (*Xie and Martin, 2015*); however, some unratcheted constrictions can also be seen.

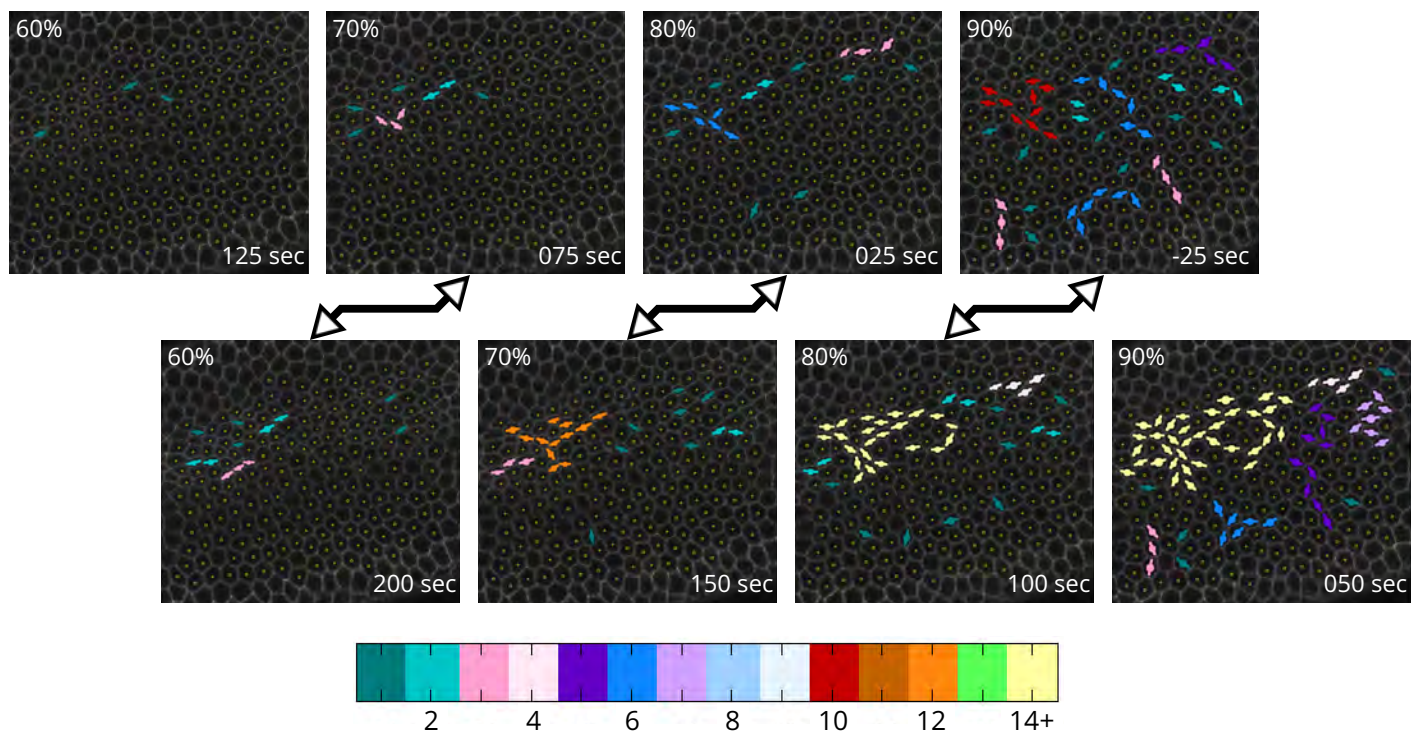

**Figure 3. Threshold Comparison.** Processed confocal microscopy images of the apical constriction phase of VFF in a single Spider-GFP embryo that have been processed with different MAL reduction threshold values ( $r_c$ ) for constricted cell identification. Time zero selected as the first frame with  $r_c = 0.65$  that has a constricted cell that persists across multiple frames. The symbol convention is the same as the one used in **Figure 2**. Double headed arrows identify frames where CCC development is relatively similar between a stronger  $r_c$  and a weaker  $r_c$  at an earlier time. Varying  $r_c$  does not change the form of the CCCs that are observed and instead shows their different stages of development.

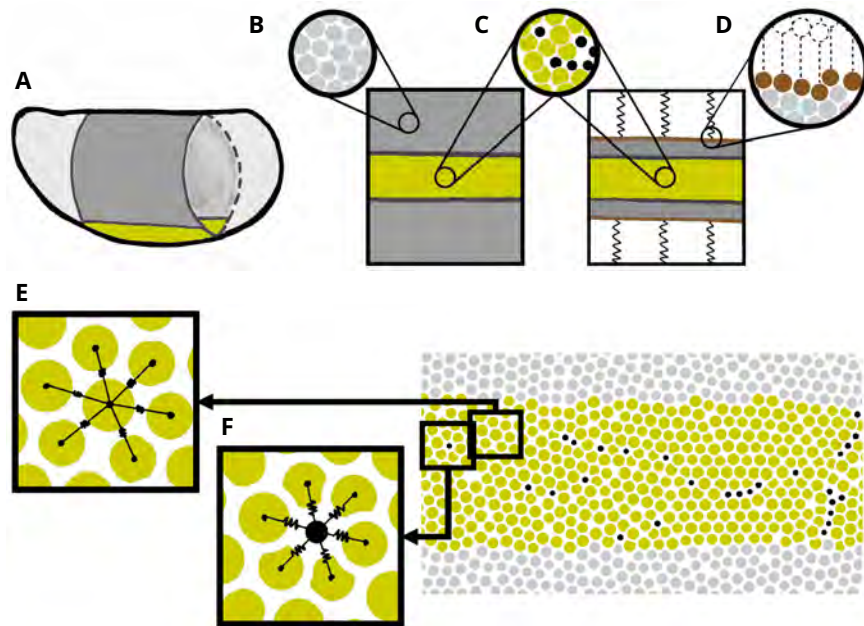

**Figure 4. AGF model schematic.** (A) The model represents the apical surface of the *Drosophila* embryo. Shown in orange is the region of active cells in the mesoderm primordium, where cells undergo apical constrictions during the initial phase of VFF. Inactive cells in the lateral and dorsal regions (shown in gray) do not experience constrictions. Inserts show how cells in both (B) inactive and (C) active regions are modeled as disks. Insert (D) shows how we implicitly model a portion of the inactive region as an effective elastic medium, in the interest of computational efficiency. (E) Cells interact with their adjacent neighbors through pairwise elastic potentials. (F) Cells maintain the same neighbors even after constriction. Constricted cells are marked in black.

112 According to the results shown in **Figure 2**, the slow phase of VFF begins with individual cells  
113 undergoing constrictions without forming any apparent spatial pattern. After this initial stage,  
114 CCCs gradually emerge, i.e., elongated chain-like configurations of constricting cells appear in the  
115 ventral region. The CCCs begin as doublets or triplets of constricted cells and rapidly grow in length.  
116 Expanding CCCs branch and merge, promoting interconnection of the constricted-cell network and  
117 eventually leading to percolation of CCCs across the active region.

118 Important insights can be obtained from an analysis of constriction patterns displayed in **Figure 3**  
119 using different MAL reduction cutoff values  $r_c$ . The comparison of the images show in the bottom  
120 row with those in the top row shows that CCCs obtained using a stronger cutoff approximately mirror  
121 those obtained with a weaker cutoff at an earlier time. This behavior implies that CCCs emerge in a  
122 highly correlated stochastic process during which cells gradually constrict while maintaining their  
123 spatial correlations.

124 Our present study focuses on spatial aspects of the constriction process. Therefore, in the  
125 analysis of the constriction patterns *in vivo* we rely on a single MAL reduction cutoff value. We  
126 choose  $r_c = 0.65$  as the standard cutoff, because for this value the observed correlations between  
127 constrictions are most pronounced. Correspondingly, the constrictions in our numerical AGF model  
128 (which is described next) are treated as instantaneous. This coarse-graining in time allows us to  
129 determine the essential features of the geometry of constriction patterns without considering  
130 complexities of temporal aspects of constrictions of individual cells.

### 131 **The AGF model predicts that tensile-stress feedback between constricting cells re-** 132 **sults in formation of CCCs**

133 Description of the AGF model

134 Epithelial cell layer represented as a system of interacting particles

135 To help explain the source of correlations between apical constrictions and the origin and role of  
136 CCCs, we will use the AGF model introduced by *Gao et al. (2016)*. The model treats apical cell ends  
137 as mechanically coupled particles and is designed to explore the role of mechanical forces and  
138 mechanical feedbacks that occur in the apical surface of the epithelial cell layer.

139 Unlike more common vertex models (*Farhadifar et al., 2007; Hufnagel et al., 2007*), the coarse-  
140 grained AGF approach does not describe individual cell membranes but instead the entire apical cell  
141 ends are represented as stress-responsive active particles that are capable of random constrictions.  
142 Such an approach is chosen because apical constrictions involve not only the actomyosin rings con-  
143 nected to both the cell membrane and the adjacent cells by adherens junctions but also the dynamic  
144 stress-bearing actomyosin meshwork in the cortical apex, responsible for ratcheted constrictions  
145 (*Martin et al., 2009*). Thus a typical vertex model would be insufficient, and a simpler particle-based  
146 AGF model that treats cells as undivided entities described by their effective properties is more  
147 adequate.

148 As depicted in the schematic shown in **Figure 4** and further discussed in the Methods section, the  
149 apical cell ends are modeled as mechanically coupled particles interacting via elastic and adhesive  
150 forces described using pairwise-additive repulsive and attractive spring potentials,

$$V_r(r_{ij}) = \frac{\epsilon}{2}(1 - r_{ij}/d_{ij})^2\Theta(d_{ij}/r_{ij} - 1), \quad (2)$$

151

$$V_a^{\text{np}}(r_{ij}) = \frac{\epsilon}{2}(1 - r_{ij}/d_{ij})^2\Theta(r_{ij}/d_{ij} - 1). \quad (3)$$

152 Here  $\epsilon$  is the characteristic energy scale,  $r_{ij}$  is the separation between particles  $i$  and  $j$ ,  $d_{ij} = \frac{1}{2}(d_i + d_j)$   
153 is their average diameter,  $\Theta(x)$  is the Heaviside step function, and the attractive potential  $V_a^{\text{np}}$  acts  
154 only between neighboring particles. The interparticle interaction forces  $f_{ij} = -dV_{ij}/dr_{ij}$ , where  
155  $V_{ij}$  is the sum of the intercellular potentials expressed by **Equation 2** and **Equation 3**, not only  
156 give the epithelial layer its mechanical integrity, but also provide feedback that coordinates apical  
157 constrictions.

158 Active, inactive, and constricted particles

159 The particles in the AGF model are divided into three categories: active particles  $\mathcal{A}$  (yellow circles in  
160 **Figure 4** and **Figure 5**), inactive particles  $\mathcal{I}$  (gray), and particles already constricted  $\mathcal{C}$  (black). The  
161 active particles occupy a stripe approximately 12 particles wide and 80 particles long, corresponding  
162 to the size of the mesoderm primordium in the *Drosophila* embryo (*Sweeton et al., 1991*). These  
163 particles undergo a stochastic constriction process in which a particle  $i$  can instantaneously constrict  
164 by reducing its diameter  $d_i \rightarrow f_c d_i$ , where  $f_c = 0.6$  is the constriction factor. Since we focus on  
165 ratcheted cell-constriction events, i.e., constrictions after which a cell does not subsequently expand  
166 (*Xie and Martin, 2015*), we assume that already constricted particles do not unconstrict or undergo  
167 any other size changes.

168 The inactive particles  $\mathcal{I}$  occupy the region outside the mesoderm primordium. These particles  
169 do not exhibit any constriction activity. However, they are an important part of the system, because  
170 they provide mechanical environment for the constriction process.

171 Stress-correlated stochastic constrictions

172 To describe a stress-correlated stochastic constriction process, we perform a sequence of simulation  
173 steps in which each active particle  $i$  can constrict with the stress-dependent probability  $P_i(s_i)$ , where  
174  $s_i$  is the feedback parameter associated with tensile forces acting on the particle. The constrictions  
175 are followed by mechanical relaxation of the medium to ensure that the process is quasistatic and  
176 therefore governed by the equilibrium stress distribution.

177 In our numerical model, the feedback parameter

$$s_i = (\sigma_i/\sigma_{\text{ref}})^p \Theta(\sigma_i) \quad (4)$$

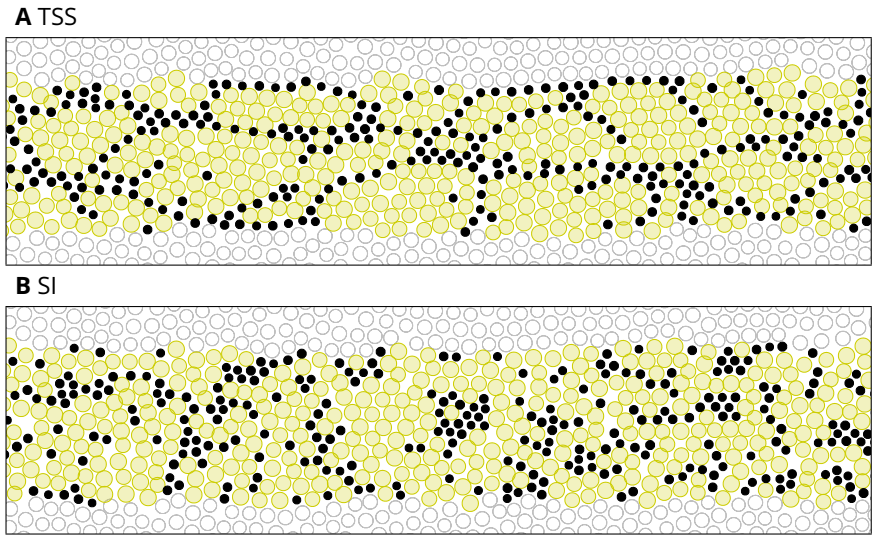

**Figure 5. The effect of tensile-stress feedback on the cellular constriction pattern.** The figure shows predictions of the AGF model for the multicellular patterns formed by constricted cells for (A) tensile stress sensitive (TSS) system and (B) stress insensitive (SI) system when 40% of cells in the active region have constricted. The tensile-stress feedback present in A results in formation of chains of constricted particles, similar to the CCCs observed during the initial phase of VFF (see Fig 2).

178 is given in terms of the triggering stress exerted on the particle  $i$  by its surrounding cells,

$$\sigma_i = -\epsilon^{-1} \sum_{j \neq i} d_{ij} f_{ij}. \quad (5)$$

179 The Heaviside step function  $\Theta$  in the feedback parameter defined by **Equation 4** selects the tensile-  
 180 stress domain  $\sigma_i > 0$ , and  $p$  is the stress-sensitivity profile parameter. As in our previous study (**Gao**  
 181 **et al., 2016**) we use  $p = 3$ , which corresponds to enhanced sensitivity to large stresses. The stress  
 182  $\sigma_i$  in **Equation 4** is normalized by the average tensile stress  $\sigma_{\text{ref}}$  experienced by a single particle  
 183 constricted in the initial configuration.

184 The constriction probabilities  $P_i(s_i)$  are calculated according to the linear relation

$$P_i(s_i) = \frac{\alpha_i(1 + \beta s_i)}{N_a(1 + \beta)}, \quad (6)$$

185 where  $N_a$  is the current number of unconstricted active particles, introduced to ensure that approx-  
 186 imately the same number of particles constrict in each simulation step. The coupling constant  $\beta \geq 0$   
 187 determines the responsiveness of cellular constrictions to the stress feedback parameter  $s_i$ , with  
 188  $\beta = 0$  corresponding to the stress insensitive (SI) case, and  $\beta \rightarrow \infty$  describing a system where tensile  
 189 stress is required for constrictions. Throughout this paper we will use  $\beta = 10^4$  in our simulations of  
 190 tensile-stress sensitive (TSS) systems; this value of  $\beta$  corresponds to a strong stress coupling. The  
 191 parameter  $\alpha_i > 0$  determines the overall magnitude of the constriction probability of a given cell. In  
 192 our simulations, we generally consider  $\alpha_i = 1$  (the same value for all cells); however,  $\alpha_i$  is different  
 193 for cells in different regions of mesoderm primordium in our robustness tests.

194 The effect of mechanical feedback on constriction patterns

195 **Figure 5** presents the key result of the AGF simulations that motivate our investigations of the role  
 196 of mechanical feedback in the constriction process. The top panel, **Figure 5A**, shows the predicted  
 197 constriction pattern in a TSS system with a strong stress feedback ( $\beta = 10^4$ ); the bottom panel,  
 198 **Figure 5B**, depicts a purely random pattern of constrictions generated from SI simulations with no  
 199 mechanical coupling ( $\beta = 0$ ). The results are shown at the stage where approximately 40% of cells  
 200 have constricted. At this fraction of constricted cells *in vivo*, the embryo would be completing the  
 201 initial slower phase of VFF (**Sweeton et al., 1991**).



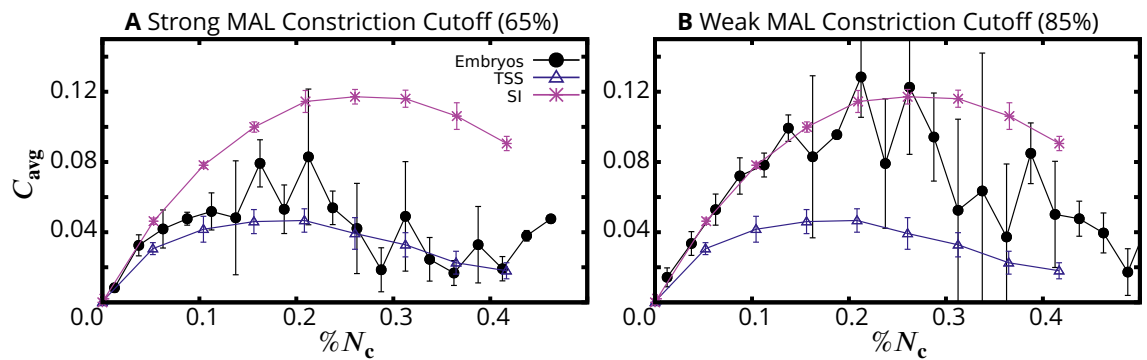

**Figure 6. The normalized average number of clusters.** Comparison between average total number of clusters  $C_{\text{avg}}$  for TSS AGF system, SI AGF system, and live embryos. The results are normalized by the number of active cells in each analyzed image or simulation frame (as defined by [Equation 7](#)). The experimental results are obtained as the average over five embryos, with constricted cells identified using (A) a strong MAL reduction cutoff  $r_c = 0.65$  and (B) a weak reduction cutoff  $r_c = 0.85$ . Theoretical data are obtained by averaging over ten simulations. The error bars represented the standard deviation. Except for the initial domain  $\%N_c < 0.05$ , the experimental data for the strong reduction cutoff in panel A closely follow the simulation results for the TSS system.

202 The simulation frames presented in [Figure 5](#) indicate that the constricted cells in the TSS system  
 203 form chains of constricted particles, similar to CCCs observed *in vivo* (see [Figure 2](#)). In contrast to  
 204 this morphology, constricted particles in the random SI case form a combination of small clumps  
 205 and short chains. We note that at the 40% fraction of constricted cells, the chains in the TSS case  
 206 organize into a percolating network, which is formed by interconnecting shorter chains that are  
 207 present at the earlier stages of the process.

208 The physical reason for the formation and growth of CCCs in the TSS system was discussed in our  
 209 previous study ([Gao et al., 2016](#)), where it was indicated that chains of constricted cells inherently  
 210 produce tensile stresses in cells close to the ends of the chain. It follows that particles close to  
 211 the chain ends are more likely to constrict, which results in chain length increase and stimulates  
 212 expansion of the chain-like microstructure. We will further discuss CCC formation mechanisms in  
 213 the sections on the stress field and robustness of VFF.

### 214 **Size distribution of CCCs observed *in vivo* is consistent with theoretical predictions** 215 **for a system with tensile-stress feedback**

216 The geometric similarity between the CCCs observed *in vivo* and those predicted by the theoretical  
 217 AGF model provides strong (though indirect) evidence that mechanical feedback via tensile forces  
 218 coordinates apical constrictions. To give further corroboration for our conclusion, we now quanti-  
 219 tatively compare constriction patterns identified in the *Drosophila* embryo with those generated  
 220 using the AGF model. To summarize, we show that the analysis of the number and size distribution  
 221 of constricted cell clusters provides means to differentiate the stress-coordinated constriction  
 222 process from the uncorrelated one. The results depicted in [Figure 6](#) and [Figure 7](#) indicate that the  
 223 experimental cluster counts are consistent with the theoretical predictions for the TSS constriction  
 224 model and do not agree with the uncorrelated SI model.

225 Our theoretical and experimental data for the normalized average number of clusters

$$C_{\text{avg}} = \langle N_{\text{cl}} / N_a^0 \rangle \quad (7)$$

226 are plotted in [Figure 6](#). Here  $N_{\text{cl}}$  is the number of constricted-cell clusters observed in a given image  
 227 or simulation frame, and  $N_a^0$  is the number of active cells (combining the constricted and uncon-  
 228 constricted ones in the observed image). The average  $\langle \dots \rangle$  is taken over five embryos (experiments) or  
 229 ten simulation runs (theory). The normalization by the number of active cells in the observed part of  
 230 the system allows us to compare experimental results in which only a portion of the ventral-furrow  
 231 region is imaged with simulations of the entire active domain. The corresponding results for the

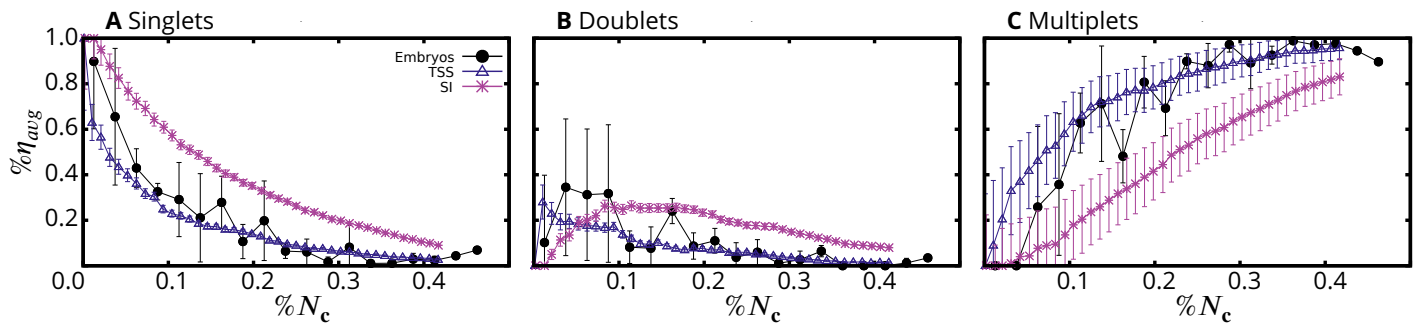

**Figure 7. Cluster size distribution.** Fraction of constricted particles  $\% \eta_{avg}$  in (A) singlets, (B) doublets, and (C) multiplets (3+) for TSS AGF system, SI AGF system, and live embryos. Constricted cells are identified using the standard strong MAL reduction cutoff  $r_c = 0.65$ . The results are obtained from the same sets of processed embryos and AGF simulations as the ones presented in **Figure 6**. Except for the initial domain  $\% N_c < 0.05$ , the experimental data closely follow the simulation results for the TSS system.

232 average fraction  $\% \eta_{avg}$  of constricted cells in singlets, doublets, and larger clusters are depicted in  
 233 **Figure 7**.

234 The results illustrated in **Figure 6** and **Figure 7** are plotted vs the fraction of active cells that have  
 235 constricted,  $\% N_c$ . The predictions from the AGF model are shown for the SI system (pink stars) and  
 236 TSS system with  $\beta = 10^4$  (purple triangles). The experimental data (black circles) are presented for  
 237 our standard MAL constriction cutoff  $r_c = 0.65$ , except for the results shown **Figure 6B**, in which we  
 238 use a weaker cutoff  $r_c = 0.85$  to provide additional insights.

#### 239 Theoretical predictions

240 The morphology depicted in **Figure 5** indicates that the tensile-stress coupling promotes the growth  
 241 of constriction chains over the creation of new ones. In contrast, there is no such mechanism in the  
 242 SI system. We thus anticipate that uncorrelated constrictions tend to produce a larger number of  
 243 smaller clusters, whereas correlations associated with tensile-stress feedback promote a smaller  
 244 number of larger clusters. The predictions from the AGF model, plotted in **Figure 6** and **Figure 7**,  
 245 are consistent with the above qualitative analysis.

246 The AGF simulations show that the normalized number of clusters  $C_{avg}$  is lower by more than  
 247 factor of two in the TSS case; the number of singlets is also significantly reduced as compared  
 248 to the SI system. The behavior of the fraction of particles in doublets is more subtle. In the SI  
 249 case, the number of doublets increases for  $\% N_c \lesssim 0.1$ , then flattens out, and gradually decreases.  
 250 The decay stems from the fact that the doublets are removed from the population by growth into  
 251 larger clusters due to random constrictions of the neighbors. In the TSS case we observe a similar  
 252 behavior, but the initial spike and the subsequent decrease of the fraction of doublets are much  
 253 more pronounced because of the constriction correlations introduced by the stress feedback. The  
 254 effect of the stress-induced correlations is also seen in the large fraction of particles in multiplets in  
 255 the TSS case.

#### 256 A comparison between experimental data and the theory

257 We now turn to the distribution of clusters of constricted cells in live embryos. We focus on clusters  
 258 identified using the benchmark MAL reduction cutoff value  $r_c = 0.65$ . Our principal observation is  
 259 that the experimental data (depicted in **Figure 6A** and **Figure 7** by black circles) are consistent with  
 260 the theoretical predictions for the TSS system but not with those for the uncorrelated SI system.

261 This clear trend is consistently seen for all quantities considered, i.e., for the normalized number  
 262 of clusters (**Figure 6A**) and the distribution of singlets, doublets, and multiplets (**Figure 7**). We find  
 263 that the experimental results agree, within the statistical inaccuracies, with the theoretical results  
 264 for the TSS system. Moreover, the experimental data consistently differ from the results for the SI  
 265 system considerably more than by the standard deviation represented by error bars.

266 The essential qualitative features of the cluster distribution predicted theoretically for the tensile-

267 stress correlated constrictions are markedly present in the experimental curves. In particular, the  
268 fraction of singlets quickly decays when the constriction process progresses; the initial rapid  
269 growth of the population of doublets is followed by a decrease to nearly zero; and a large fraction  
270 of constricted cells form multiplsets. Thus our results not only show that apical constrictions  
271 are spatially correlated but also provide evidence that these correlations are a consequence of  
272 mechanical feedback via tensile stress.

273 While the overall agreement between the theory and experiments is quite compelling, there is a  
274 discernible discrepancy at the beginning of the constriction process. Namely, for the constricted-cell  
275 fractions  $\%N_c$  below approximately 0.05, the experimental results show noticeable overpopulation  
276 of singlets and underpopulation of multiplsets as compared to theoretical predictions for the TSS  
277 system. Moreover, we observe that in this initial CCC formation regime the experimental results  
278 follow the curves for the uncorrelated SI constriction process.

279 The likely source of this initial uncorrelated behavior is a delay in cell response to mechanical  
280 feedback *in vivo*. Because of this delay, spatial correlations between apical constrictions need some  
281 time to build up. Such a delay is not built in into our coarse-grained AGF model because we want to  
282 keep the model simple without introducing unnecessary fitting parameters.

283 Furthermore, our experimental results show that the delay of establishing a spatially correlated  
284 constriction pattern is much more pronounced for weaker constrictions. This phenomenon can  
285 be seen in the results presented in **Figure 6B** for the normalized number of clusters of constricted  
286 cells identified using the MAL reduction cutoff  $r_c = 0.85$ . The results obtained using this weak  
287 cutoff correspond mostly to pulsed unratcheted constrictions. We find that the experimental data  
288 follow the random SI result until approximately 25% cells constrict. Subsequently, the measured  
289 number of clusters crosses over towards the theoretical curve for the TSS system. This long delay  
290 before the correlations between weak constrictions are established likely stems from the fact the  
291 small-amplitude constrictions produce weak stresses. A significant feedback occurs only after  
292 the stress builds up when the number of constricted cells and/or constriction amplitude become  
293 sufficiently large.

294 The results obtained using strong and weak MAL thresholds, taken together present a cohesive  
295 picture of the initial slow phase of apical constrictions. Cells begin pulsing stochastically, generating  
296 fleeting bursts of tensile stress through the mesoderm primoridium. These stress bursts com-  
297 bine constructively to trigger some cells to begin ratcheted apical constrictions. Cells performing  
298 ratcheted apical constrictions generate a consistent underlying stress field that permeates the  
299 mesoderm primoridium, promoting the triggering of ratcheted apical constrictions along paths of  
300 high tensile stresses.

### 301 **CCCs Develop Along Underlying Chains of Aligned Tensile Stress**

302 Important insights regarding the growth of CCCs can be gained from an analysis of the underlying  
303 stress distribution predicted by the AGF model. Our discussion will focus on the dynamics of the  
304 TSS system, with the uncorrelated SI system being used as a basis for comparison. In the time lapse  
305 simulation frames shown in **Figure 8**, the stress is characterized in terms of the major principal  
306 stress and the direction of its axis. The stress tensor is evaluated from the virial expression (see  
307 **Equation 10**), as discussed in the Methods section.

308 We use here the following color coding and notational convention: inactive cells are outlined  
309 in grey, active cells in orange, and constricted cells in black with a black dot in the center. The  
310 fill color of both active and constricted cells indicates whether the cell is under tension (red) or  
311 compression (blue); deeper color saturation corresponds to stronger major stress magnitude.  
312 Active and constricted cells experiencing an above average stress magnitude are also tagged with a  
313 black bar showing the orientation of the major stress axis on each particular cell.

314 An examination of the sequence of TSS time lapse frames depicted in **Figure 8A** shows that  
315 formation of CCCs is a highly nonlocal process. It involves not only tensile stresses in the immediate  
316 neighborhood of already constricted cells, but also relies on the nonuniform stress distribution

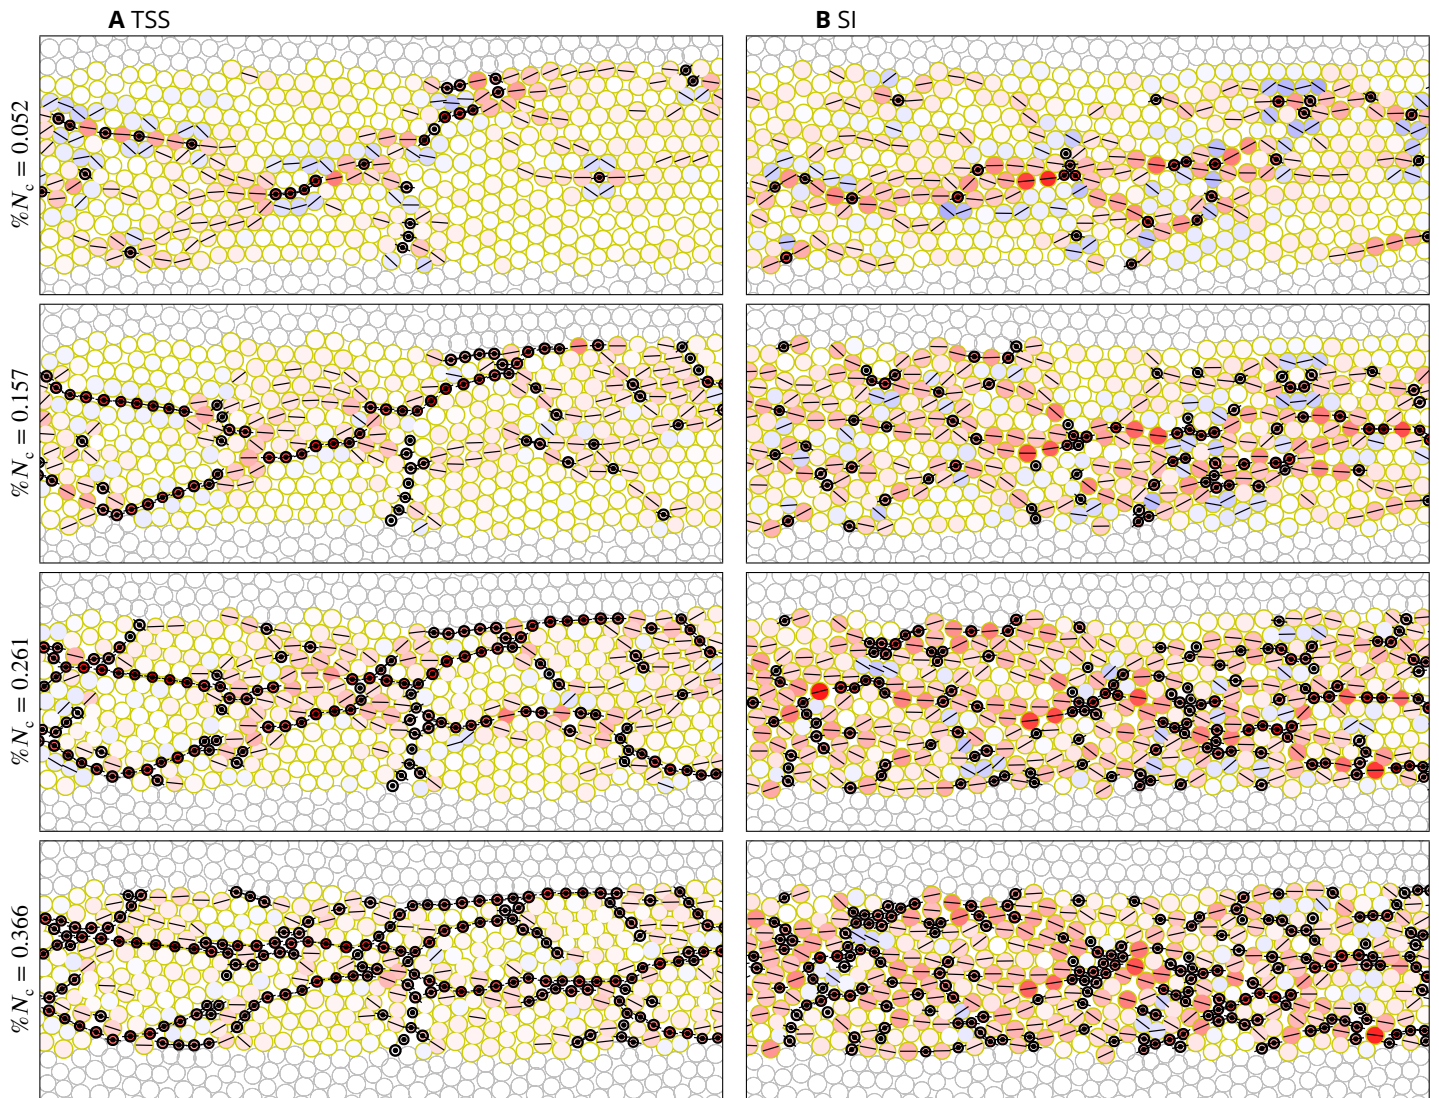

**Figure 8. Development of the stress field in the active region.** Time lapse AGF simulation frames of a (A) tensile stress sensitive (TSS) and (B) stress insensitive (SI) system colored to show the distribution of major stresses through the active region. Inactive cells are outlined in gray and active cells in orange; constricted cells are outlined in black and are marked with a dot in the center. The fill color of all active and constricted cells shows tensile (red) and compressive (blue) major stresses, where the color saturation indicates relative strength. Black lines in the direction of the major stress axis are drawn for cells with the major stress stronger than the average during each snapshot. Linear arrangements of red particles with aligned major stress axis indicate that in both TSS and SI systems the stress propagates along stress chains. In the TSS system these chains are precursors of CCCs, which eventually carry most of the tensile stress in the active region.

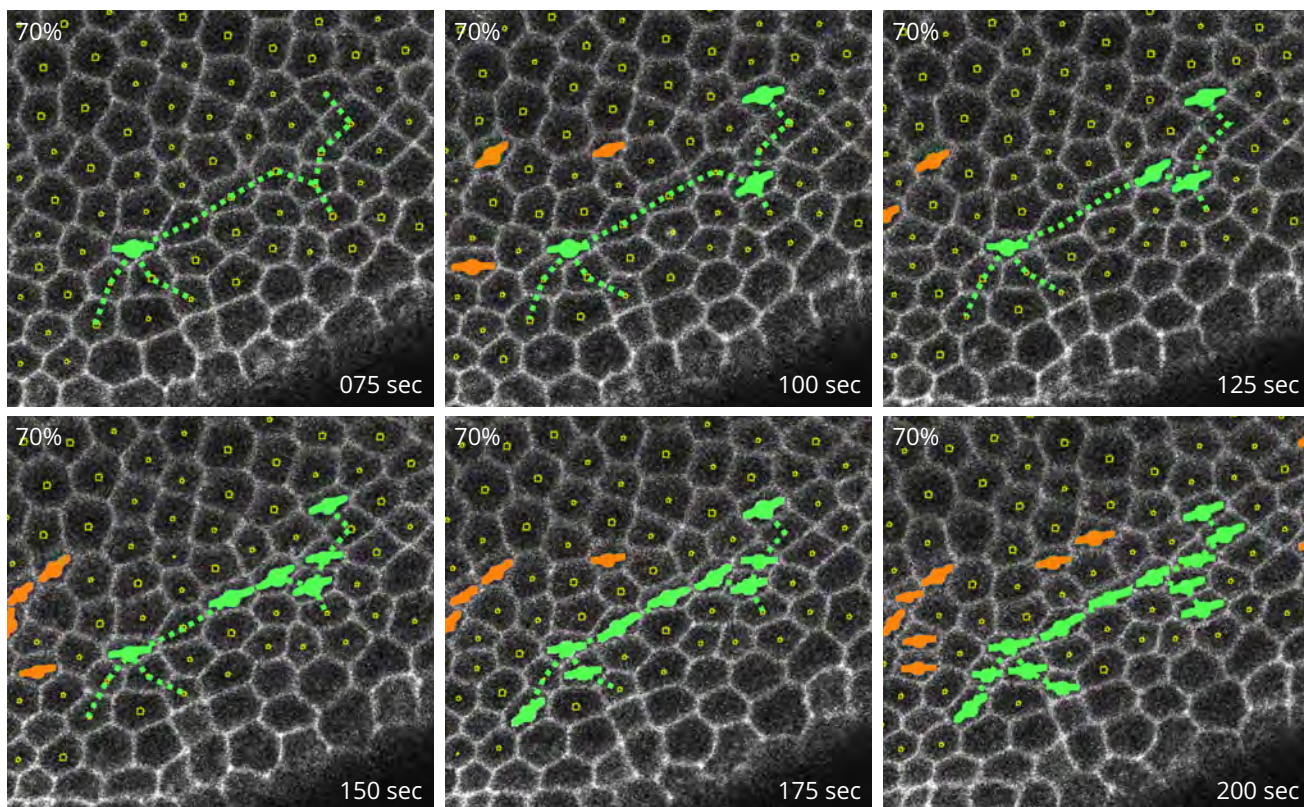

**Figure 9. Piecewise formation of a CCC.** Processed confocal microscopy images of the ventral side of a Spider-GFP embryo during the initial slow apical constriction phase of ventral furrow formation (VFF). Constricted cells are identified using  $r_c = 0.70$ ; time zero is selected as the first frame with the standard  $r_c = 0.65$  that has a constricted cell that persists across multiple frames. The constricted cells highlighted in green initially form linearly arranged singlets and doublets, which are later connected into a single CCC. As an eye guidance, the dotted line indicates the final connectivity of the CCC.

317 associated with the formation of tensile stress chains, defined as groups of linearly arranged  
318 particles with above-average tension aligned in the chain direction. In **Figure 8** the stress chains  
319 are visible as linear groups of red particles (the color indicating high tensile stress) with aligned  
320 black bars indicating the major stress axis. The stress chains we observe in the AGF system are  
321 closely related to force chains along which stress propagates in granular media (**Kondic et al., 2012**;  
322 **Tordesillas et al., 2015**).

323 The progression of the constriction process depicted in the subsequent frames of **Figure 8A**  
324 indicates that the stress chains are precursors of CCCs. Consider, for example, the behavior of  
325 the line of cells seen in the top-right of the active region. These cells are under tension (red) for  
326  $\%N_c = 0.052$ , and by  $\%N_c = 0.261$  most them have constricted. In many instances the CCCs in the  
327 TSS system do not emerge by adding cells one by one to an already existing chain. Instead of such a  
328 continuous-growth progression, the constricted particles initially form singlets and doublets along  
329 the stress chain, to be later connected into a larger chain through constrictions of the missing cells  
330 in the CCC.

331 The above behavior is evident in the stress chain seen at the top-left of the active region in  
332 **Figure 8A**. This stress chain has three singlets and a doublet embedded in it at  $\%N_c = 0.052$ , and  
333 becomes a single CCC at  $\%N_c = 0.157$ . Similar initially disconnected chains develop *in vivo*, as shown  
334 in a representative image in **Figure 9**. Such piecewise formation of CCCs provides further evidence  
335 that tensile-stress feedback coordinates apical constrictions.

336 The stress chains are mostly arranged in the longitudinal direction because the inactive lateral  
337 regions provide only a moderate mechanical resistance. Thus, the CCCs emerging as a result of  
338 mechanical feedback are also mostly oriented longitudinally. This feature is consistent with the  
339 experimental observations showing chains of constricted cells oriented primarily in the anteropos-  
340 terior direction.

### 341 **AGF model predicts that tensile-stress feedback aids robustness of VFF**

342 In this and the following section we address the question of how the embryo can achieve robustness  
343 of VFF in the presence of spatial fluctuations of cell ability to constrict. In live embryos such  
344 fluctuations can occur naturally due to randomness of biophysical processes. Local fluctuations can  
345 also be produced experimentally, using optogenetic techniques (**Guglielmi et al., 2015**).

346 To generate theoretical predictions for possible effects of mechanical feedback on robustness of  
347 VFF, we consider an AGF model system with locally reduced magnitude of the constriction probability  
348 function. The reduction is achieved by decreasing the probability amplitude  $\alpha_i$  (see **Equation 6**) for  
349 active particles in a prescribed disrupted region. **Figure 10** and **Figure 11** show results for a band  
350 of affected active cells, and in **Figure 12** the disrupted region is in a shape of an ellipse. In both  
351 cases we find that tensile-stress feedback introduces mechanisms for robustness of the constriction  
352 process.

353 In this section we use the following color coding convention. Inactive cells are outlined in grey,  
354 active unaffected cells in orange, active perturbed cells in green, and constricted cells in black with  
355 a black dot in the center. The fill color will follow the same color and saturation convention as the  
356 one used in **Figure 8**, with tensile major stresses being red and compressive being blue. Active  
357 or constricted cells experiencing an above average stress magnitude will again have a black bar  
358 representing the orientation of the majors stress.

#### 359 **Affected band model**

360 **Figure 10** shows particle configurations and stress distributions for systems with a band of cells  
361 whose constriction probability amplitude (the factor  $\alpha_i$  in **Equation 6**) has been decreased by by 40%  
362 (top), 60% (middle), and 80% (bottom) as compared to the reference value  $\alpha_i = 1$  for the unaffected  
363 active cells. Simulation frames are presented for the fraction of constricted cells  $\%N_c = 0.3$ ; the  
364 affected particles are in the green region between two vertical lines, and the unaffected particles

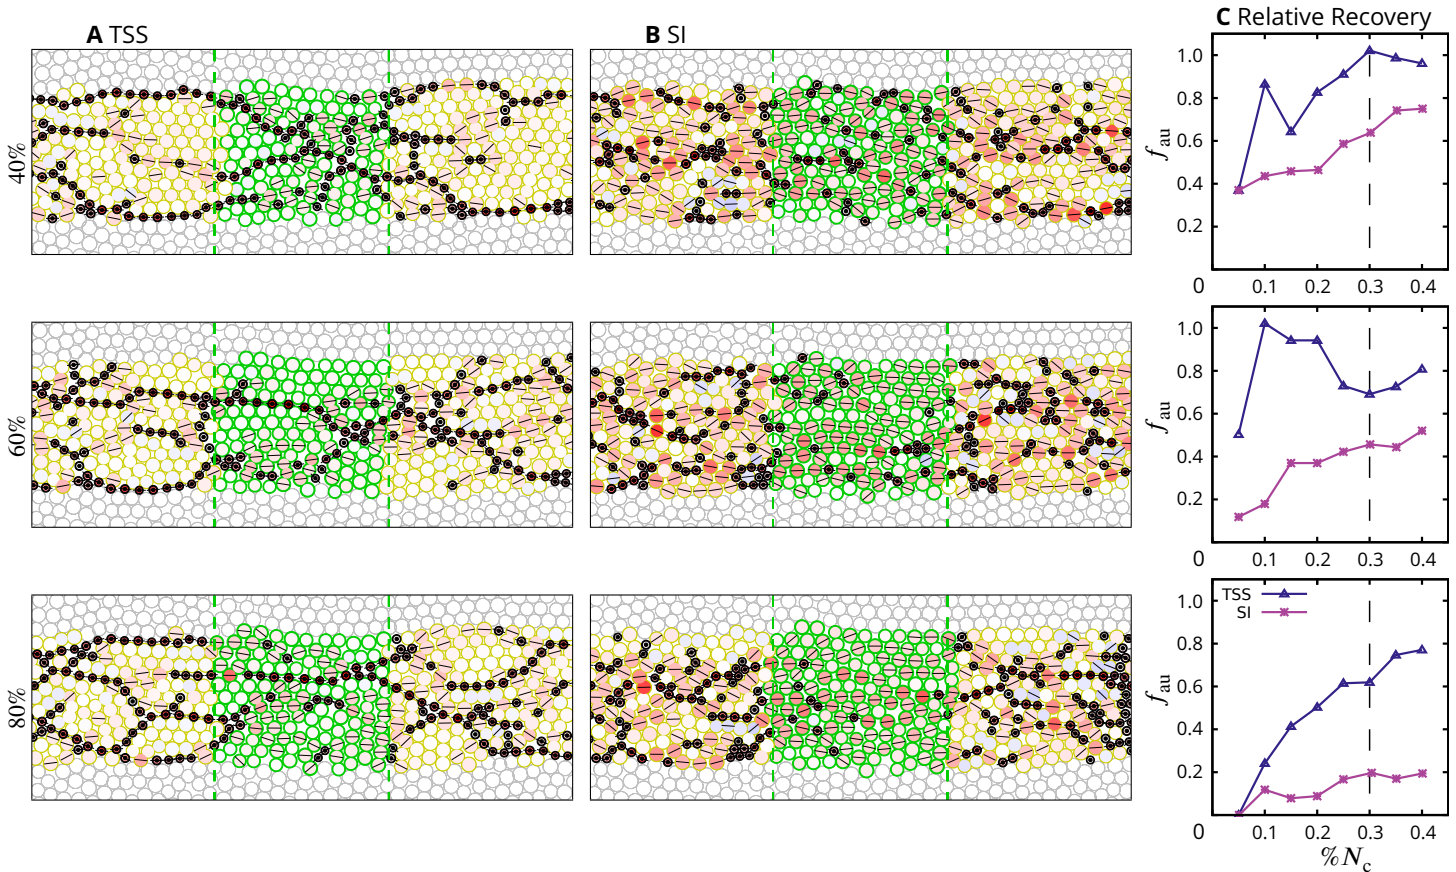

**Figure 10. AGF system with a band of cells of decreased constriction probability.** Simulation snapshots for (A) tensile stress sensitive (TSS) and (B) stress insensitive (SI) system with a band of cells whose constriction probability is reduced by 40%, 60%, and 80%. The images follow the color convention used in [Figure 8](#), with the addition of cells outlined in green to represent active cells with the reduced constriction probability in the affected area between the two dashed lines. (C) Plots showing the constriction-reduction factor  $f_{\text{au}}$  vs the fraction of constricted cells  $\%N_c$  for systems for which representative simulation frames are depicted in A,B. The frames correspond to  $\%N_c = 0.3$ , which value is indicated by the dashed black lines in C. The constriction-reduction factor  $f_{\text{au}}$  (defined in [Equation 8](#)) reflects how well the affected region is performing compared to the unaffected areas, with  $f_{\text{au}} = 1$  indicating full recovery of the affected region. All three plots show that TSS system exhibits substantial recovery at sufficiently large values of  $\%N_c$ . This behavior provides evidence that tensile stress feedback enhances robustness of the constriction process.

365 in the orange regions. The results are depicted for both TSS and SI constrictions to highlight the  
 366 differences in the system development with and without the stress feedback.

367 We start our discussion with the observation that the constriction patterns and stress distribu-  
 368 tion in the unaffected regions are similar to those in a uniform system with a similar fraction of  
 369 constricted cells (see the results depicted in [Figure 8](#) and [Figure 10](#)). We thus focus our analysis on  
 370 the disrupted regions, i.e., the regions with the reduced constriction probability amplitude  $\alpha_i < 1$ .

371 The examination of the affected regions between the two vertical lines in [Figure 10A](#) and  
 372 [Figure 10B](#) shows a striking difference between the uncorrelated SI system and the TSS system  
 373 with mechanical feedback. In the purely random SI case the fraction of constricted cells in the  
 374 affected band is reduced by a factor that is commensurate with the imposed decrease in the  
 375 constriction probability. For example, in the SI system with 80% reduction there are only a few  
 376 constricted particles in the affected domain. In contrast, in the corresponding TSS system there  
 377 is a CCC percolating through the affected band, and the overall number of affected particles that  
 378 have constricted is much larger. A similar behavior is observed at lower values of the probability  
 379 amplitude reduction. In particular, in the TSS system with a moderate 40% reduction of the  
 380 probability amplitude  $\alpha_i$ , the only distinguishable feature of the disrupted region is an additional  
 381 buildup of tensile stresses there, as compared with the unaffected regions.

382 To quantitatively compare the affected band of cells to the unaffected regions we consider the

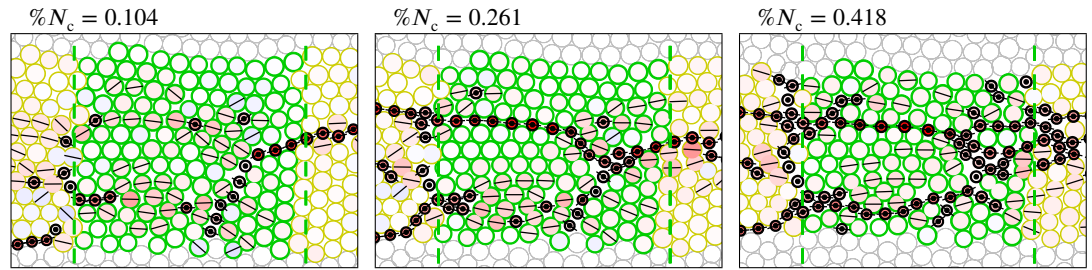

**Figure 11. Rescue mechanism for cellular constrictions via tensile-stress feedback.** Blow-up view of the band of affected particles in a TSS system with the constriction probability in the affected region reduced by 60%. The images follow the color convention used in **Figure 10**. The left frame of the time-lapse sequence shows the initial formation of tensile-stress chains crossing the affected zone. The constriction probability is elevated along these chains because of tensile-stress feedback. Thus particles constrict along the precursor stress chains, forming CCCs crossing the affected region.

383 constriction-reduction factor

$$f_{\text{au}} = \frac{\%N_c^a}{\%N_c^u}, \quad (8)$$

384 where  $\%N_c^a$  and  $\%N_c^u$  denote the fraction of active cells that constricted in the affected and unaf-  
 385 fected regions, respectively. According to the above definition,  $f_{\text{au}} = 1$  occurs if the affected region  
 386 recovers to the normal behavior.

387 The constriction-reduction factor  $f_{\text{au}}$  is shown in **Figure 10C** vs the fraction of constricted cells  
 388  $\%N_c$  for the systems depicted in **Figure 10A** and **Figure 10B**. We find that  $f_{\text{au}}$  is consistently higher  
 389 for TSS constrictions (purple triangles) than the corresponding quantity for SI constrictions (pink  
 390 stars). Moreover, due to the presence of tensile feedback, the constriction-reduction factor  $f_{\text{au}}$   
 391 in the TSS case is close to one at  $\%N_c = 0.4$ , even for the 80% probability reduction. This result implies  
 392 that tensile-stress feedback produces nearly full constriction recovery at the development stage  
 393 corresponding to the onset of the fast VFF phase *in vivo*.

### 394 The rescue mechanism

395 The mechanism by which tensile-stress feedback rescues apical constrictions in the disrupted zone  
 396 is illustrated in **Figure 11**. The left panel shows that constrictions, which initially occur with higher  
 397 frequency in the unaffected domain, cause gradual buildup of tensile stress chains in the affected  
 398 region. Thus, due to the mechanical feedback represented in **Equation 6** by the parameter  $s_i$ , the  
 399 constriction probability is elevated for the affected cells under tension.

400 Hence, CCCs penetrate the affected zone along the tensile stress chain, as depicted in the  
 401 right panel of **Figure 11**, rescuing the constriction process. The above analysis clearly indicates  
 402 that the mechanical feedback may offer robustness of VFF by providing a mechanism to even out  
 403 irregularities of the pattern of constrictions. Since the constricted cells carry most of the tensile  
 404 stress, consistent constriction pattern along the furrow facilitates coherent invagination.

### 405 Elliptical Affected Region

406 **Figure 12** shows the progress of apical constrictions in a TSS system with an ellipsoidal affected  
 407 region at the center of the active domain. The lateral size of the ellipse is of about 75% of the  
 408 width of the active region, so there are unaffected cells above and below the ellipse. The time-  
 409 lapse images are presented for a moderate 40% and complete 100% reduction of the constriction  
 410 probability.

411 The depicted simulation frames indicate that CCCs promote recovery of a balanced constriction  
 412 pattern in two ways, depending on how strongly the affected region is perturbed. At the moderate  
 413 probability reduction, the prevailing recovery mechanism is the penetration of CCCs into the affected  
 414 region after the stress chains build up. This mechanism is the same as the one described for a band  
 415 of affected cells. For the 100% constriction probability reduction ( $\alpha$ , reduced to zero) the affected



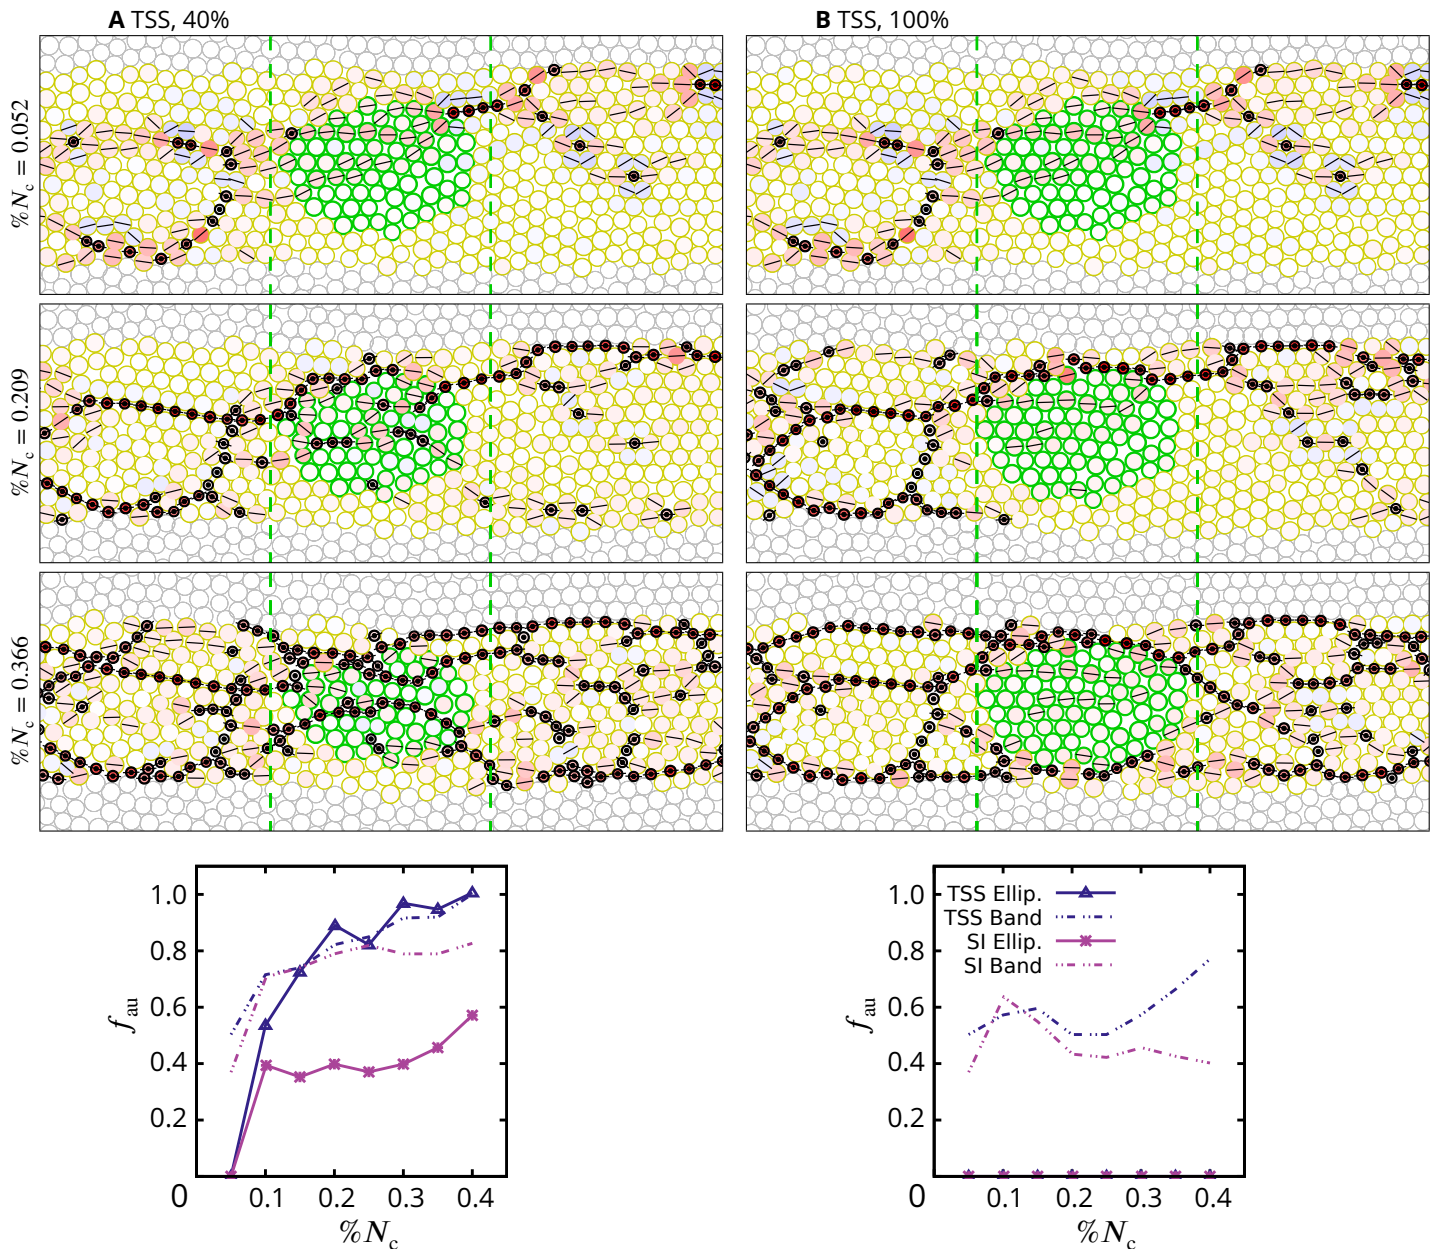

**Figure 12. AGF system with an elliptical region of decreased constriction probability.** Time-lapse simulation frames and corresponding graphs of the constriction-reduction factors for a TSS system with an elliptical region of cells whose constriction probability is decreased by (A) 40% and (B) 100%. The images follow the color convention used in [Figure 8](#), with the addition of cells outlined in green to represent active cells with the reduced constriction probability in the affected area between the two dashed lines. The graphs show two different measures of recovery: the constriction-reduction factor  $f_{au}$  for the affected elliptical region and the corresponding factor  $\bar{f}_{au}$  for the band of cells that includes the affected region and the active cells below and above it (i.e., the entire area between the dashed green vertical lines). The constriction-reduction factors are plotted both for the simulations shown in the depicted frames and for the corresponding SI system with no feedback. For 40% reduction of the probability, A, the TSS system undergoes constriction recovery by penetration of CCCs into the affected ellipsoidal region; for 100% reduction, B, the recovery occurs by CCCs wrapping around the affected ellipse.

416 cells cannot constrict. In this case we observe that CCCs wrap around the affected ellipse instead of  
 417 penetrating it. In spite of severity of the local constriction disruption, formation of the envelope of  
 418 CCCs around the affected region results in a relatively uniform constriction pattern.

419 To quantitatively characterize the chain-penetration and wrapping-around mechanisms by which  
 420 mechanical feedback rescues a balanced constriction pattern we consider two complementary  
 421 measures of recovery (see the graphs on the bottom of [Figure 12](#)). The first measure is the relative

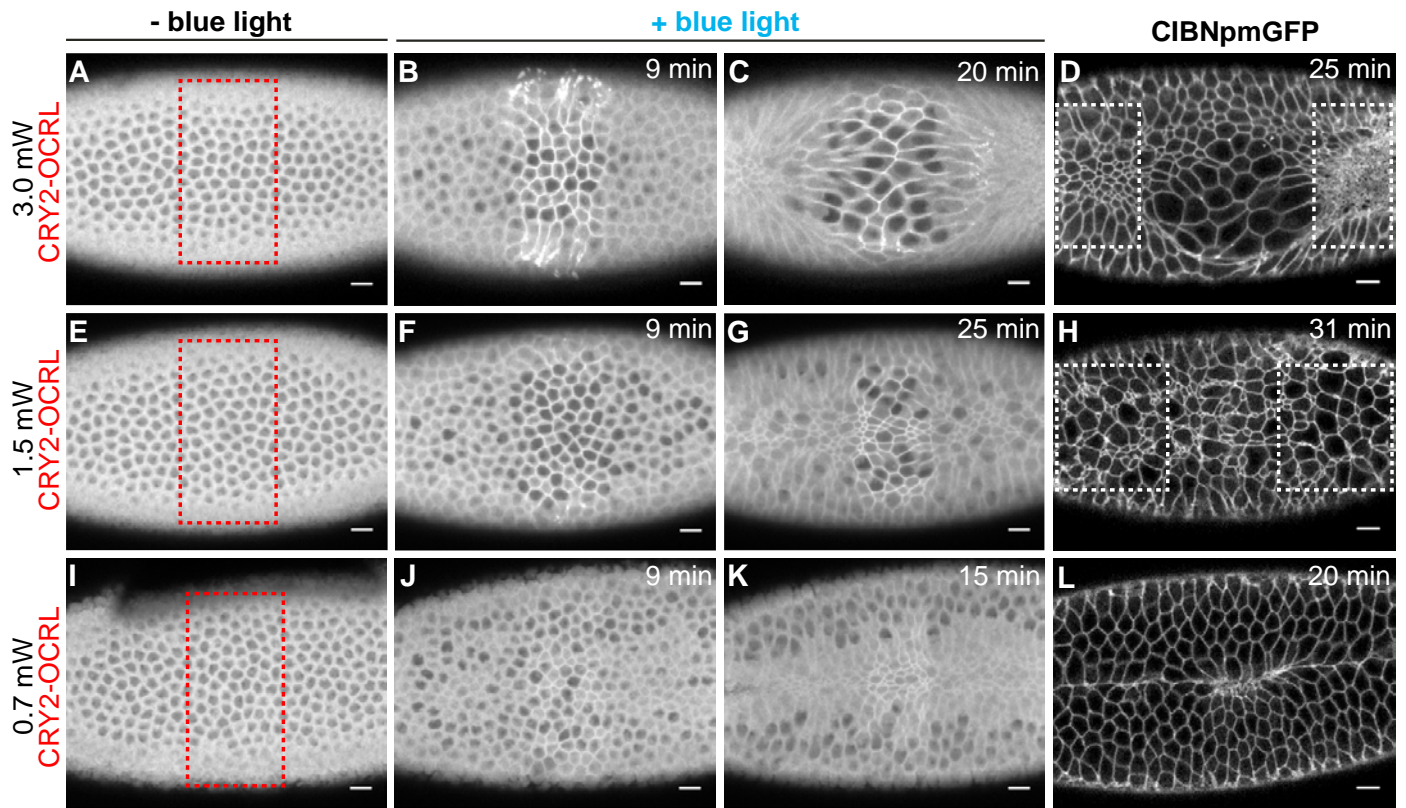

**Figure 13. Confocal images of representative embryos with a zone of optogenetically reduced contractility.** The images show the apical surface of the ventral mesoderm of optogenetically engineered embryos. To locally reduce cell contractility, the embryos were exposed to blue light in the zone indicated by the red box in left panels. The power of blue light is proportional to the amount of cell contractility reduction. The affected zone was photo activated with (A)–(D) 3 mW, (E)–(H) 1.5 mW, and (I)–(L) 0.7 mW laser beam. The first three images in each row are still images from a confocal movie, and the last frame is a high-resolution confocal image. Time after photo-activation as indicated. For 0.7 mW and 1.5 mW laser power, the images show a significant number of constricted cells in the affected region, forming chain-like arrangements. For the 3.0 mW laser power, constricted cells appear to wrap around a large cluster of unconstricted (expanded) cells. Figure reprinted from *Guglielmi et al. (2015)* under the article’s CC BY license.

422 fraction of constricted cells in the affected region  $f_{\text{au}}$ , as defined by *Equation 8*. This quantity  
 423 characterizes constriction rescue by the penetration of CCCs into the affected region. The second  
 424 measure is the relative fraction of constricted cells evaluated for the entire band of active cells that  
 425 encompasses the affected region ( see the area between the two dashed green lines in time lapse  
 426 images of *Figure 12*). This measure (denoted  $\tilde{f}_{\text{au}}$ ) includes contributions from both the penetrating  
 427 and wrap-around chains.

428 The results depicted in the graph shown at the bottom of *Figure 12A* indicate that for a moderate  
 429 probability-amplitude reduction, the fraction of constricted cells in the affected region is completely  
 430 recovered before the system reaches the fast-phase threshold  $\%N_c = 0.4$ . The recovery is manifested  
 431 in both measures  $f_{\text{au}}$  and  $\tilde{f}_{\text{au}}$ . In the case of the probability reduction to zero we have  $f_{\text{au}} = 0$ , because  
 432 there are no constrictions in the affected region. However, the parameter  $\tilde{f}_{\text{au}}$  shows that there is a  
 433 significant recovery of the constriction pattern by the wrap-around mechanism.

#### 434 **Optogenetic experiments provide evidence of robustness of apical constrictions in** 435 **Live Embryos**

436 Optogenetic inhibition of cell contractility in experiments by *Guglielmi et al. (2015)*  
 437 The results of our computational investigations of the TSS systems with locally lowered constriction  
 438 probability are strikingly similar to experimental findings by *Guglielmi et al. (2015)*. These authors

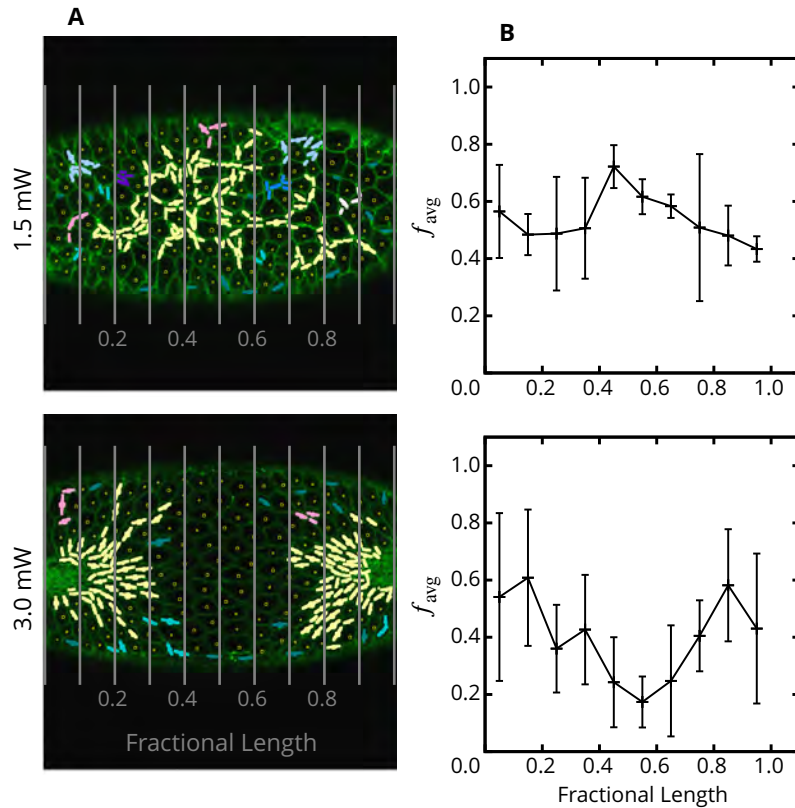

**Figure 14. Processed images and calculated fractions of constricted cells in optogenetically disrupted embryos.** (A) Representative images of embryos which failed to complete VFF due to having a band of cells about their length center optogenetically activated with 1.5 mW (top) and 3.0 mW (bottom) laser. The cells have been marked as constricted if their MAL is below the cutoff value of  $1.3 \mu\text{m}$ . (We do not use relative MAL reduction as the constriction criterion because of unavailability of the reference data). The colors represent the number of cells belonging to a single constricted-cell cluster according to the scale defined in [Figure 2](#). Notice that CCCs penetrate the affected region for the 1.5 mW case but not the 3.0 mW case. (B) Averaged binned fraction of constricted cells,  $f_{\text{avg}}$ , vs fractional position along the observed portion of the mesoderm primordium, as defined by the vertical lines in the corresponding images shown in A. (Averages over  $n = 3$  embryos.) The results for 1.5 mW laser beam do not show any constriction deficit in the affected region, indicating a recovery of contractile activity, consistent with our predictions. For 3.0 mW laser power there is a significant deficit of constrictions in the affected zone, but the contractile activity does not drop to zero.

439 developed an optogenetic approach to locally affect the ability of cells to contract during VFF in the  
 440 *Drosophila* embryo. Specifically, they targeted PI(4,5)P2 to rapidly deplete actin from the embryonic  
 441 cell cortex and therefore to reduce actomyosin contractility in a photo-activated region.

442 As depicted in [Figure 13](#), reprinted from their study, [Guglielmi et al. \(2015\)](#) used three different  
 443 levels of laser power to optogenetically modulate the contractility in a band of cells in the central  
 444 part of mesoderm primordium. The photo-activated band is analogous to the affected zone in  
 445 our AGF model; we will thus discuss their experimental results in the context of our theoretical  
 446 predictions.

447 Illuminating the embryo using different laser powers allowed [Guglielmi et al. \(2015\)](#) to vary the  
 448 degree of the local cell contractility inhibition, thus affecting the morphology of the developing  
 449 tissue to a varying degree. According to [Figure 13I–L](#), applying the lowest power level of 0.7 mW  
 450 did not prevent the ventral-furrow invagination, although there is a clear defect in the furrow  
 451 morphology seen in [Figure 13L](#). For higher levels of the laser power 1.5 mW ([Figure 13E–H](#)) and  
 452 3.0 mW ([Figure 13A–D](#)) there was no transition to the fast phase of VFF and the embryo failed to  
 453 invaginate.

454 An analysis of constriction patterns at different photo-activation levels

#### 455 Weak photo-activation

456 The images shown in **Figure 13J** and **K** for the lowest level of the optogenetic activation (0.7 mW  
457 laser power) reveal constriction chains crossing the affected region of reduced cell contractility (in  
458 the middle part of the frame). While the contrast of the images is insufficient for a quantitative  
459 comparison, the fraction of constricted cells in the unaffected and optogenetically affected regions  
460 appear to be approximately the same, consistent with our theoretical predictions for the rescue of  
461 the constriction process in the TSS system.

#### 462 Moderate photo activation

463 A similar conclusion can be drawn from an analysis of the images of the embryo illuminated with a  
464 moderate power 1.5 mW laser beam. In addition to a visual inspection, we performed a quantitative  
465 analysis of experimental data in this case, using high-contrast images that are available for the final  
466 state of the constriction process (see the example shown in **Figure 13H**).

467 An examination of unprocessed images shown in **Figure 13G** and **H** as well as an analysis of the  
468 processed image depicted in the top panel of **Figure 14A** indicate that CCCs penetrate the affected  
469 region. This conclusion is quantitatively supported by the corresponding plot of the local fraction of  
470 constricted cells presented in **Figure 14B**. The results do not show any deficit of constricted cells in  
471 the affected domain, in spite of a significant disruption of the ability of cells to constrict. We recall  
472 that our simulations depicted in **Figure 10** predict a substantial recovery of constrictions even at  
473 80% reduction of the constriction probability; thus a strong recovery of the fraction of constricted  
474 cells can be expected.

475 The relatively consistent behavior across 1.5 mW embryos (i.e. affected and unaffected regions  
476 behaving similarly) was recognized by **Guglielmi et al. (2015)** and attributed to the fact that some  
477 cells within the affected area retained the capability to contract while others did not. We provide  
478 here a specific interpretation of this behavior in terms of mechanical feedback, which rescues the  
479 ability to constrict in cells that are subject to elevated tensile stress.

480 We also note that, according to **Figure 14B**, the fraction of constricted cells,  $f_{\text{avg},t}$  in the analyzed  
481 frames is larger than 40%. This is because the transition to the second fast phase of VFF has not  
482 occurred, and apical constrictions continued beyond the usual 40% slow-to-fast-phase transition  
483 threshold. Progression of the slow phase of constrictions beyond the time at which invagination  
484 usually takes place (compare the results for 0.7 mW and 1.5 mW power in **Figure 14**) is likely to  
485 be responsible for strong bidispersity of cell sizes seen in **Figure 13H**. Namely, the cells in already  
486 formed CCCs continued to constrict, causing the others to expand. A similar behavior can be seen  
487 in images of embryos with delayed or failed VFF due to injection of Rho kinase inhibitor (**Krajcovic  
488 and Minden, 2012**).

#### 489 Strong photo activation

490 We now discuss constriction patterns at the highest illumination level. The results depicted in  
491 **Figure 13A–D** show that the 3.0 mW laser beam hinders constrictions in the affected zone almost  
492 entirely. The optogenetic disruption leaves the cells unable to perform active mechanical responses,  
493 and as a result, they stretch and enlarge when being pulled. However, as already noted by **Guglielmi  
494 et al. (2015)**, the cells bordering the affected region still constrict; this behavior is similar to the  
495 constriction pattern seen in our simulations for the ellipsoidal affected domain, where tensile-  
496 stress sensitivity results in formation of CCCs wrapping around the region of hindered contraction  
497 probability (see **Figure 12B**). Consistent with the above observations, the plot shown at the bottom of  
498 **Figure 14B** suggests that even at 3.0 mW illumination there is some constriction recovery (although  
499 much weaker than in the ellipsoidal-affected-region case in our AGF model).

500 To summarize our findings, the results of the optogenetic experiments by **Guglielmi et al.  
501 (2015)** agree well with predictions our theoretical analysis of the role of mechanical feedback in  
502 coordinating apical constrictions to enhance robustness of VFF. In particular, the experiments show  
503 that chains of constricted cells either penetrate or wrap around the affected region, depending on

504 the degree of hindrance of cell contractility. Also there is a substantial recovery of constrictions in  
505 the optogenetically affected band of cells. These phenomena, predicted by our AGF model, would  
506 be difficult to explain without the the assumption that the tensile-stress feedback coordinates cell  
507 constrictions.

## 508 Discussion

509 In the formation of the *Drosophila* ventral furrow (VF), a field of cells, specified by the dorsoventral  
510 patterning system to be the mesoderm primordium (*Leptin, 1999*), initiate a multi-step morphologi-  
511 cal change by flattening their apices (*Leptin and Grunewald, 1990; Sweeton et al., 1991*). The apical  
512 actomyosin cytoskeleton undergoes contractile pulses of three varieties: unconstricting, unratch-  
513 etted constricting and ratcheted constricting pulses (*Martin et al., 2009; Xie and Martin, 2015*).  
514 The ratcheted pulses result in progressive apical constriction of particular VF primordial cells (*Xie  
515 and Martin, 2015*). Originally thought to be stochastic in nature (*Sweeton et al., 1991*), it was later  
516 found that these constrictions were not stochastic and that a cell that had undergone ratcheted  
517 apical constrictions, and its neighbors, were more likely to undergo ratcheted constrictions than  
518 non-neighboring cells (*Xie and Martin, 2015*).

519 Our recent work showed that non-stochastic apical constrictions occur at a higher order of  
520 organization than neighboring cells. We observed that apical constrictions appeared to form a  
521 roughly linear pattern oriented along the anterior-posterior axis shortly before the transition to  
522 the fast phase of apical constrictions regulated by Fog and T48 signaling pathways occurred (*Gao  
523 et al., 2016*). Apically constricted cells form in chains (CCCs) that extend along the length of the VF  
524 primordium. Instead of direct chaining by neighbor to neighbor interactions, our initial observations  
525 and modeling results suggested that anterior-posterior-biased chaining occurs along lines of tensile  
526 stress with apical constrictions occurring along the chain (*Gao et al., 2016*). Evidence of tensile stress  
527 along the anterior-posterior axis of the VF primordium was shown using laser cutting experiments  
528 (*Martin et al., 2010*), and was supported by our earlier modeling efforts (*Gao et al., 2016*).

529 Here, we extend the preliminary observations and results in a statistical comparison between  
530 our active granular fluid (AGF) model and detailed confocal imaging of live embryos undergo-  
531 ing ratcheted apical constrictions. The key observations of our theoretical and experimental  
532 investigations include:

- 533 1. A quantitative agreement between the measured distribution of clusters of constricted cells  
534 *in vivo* and theoretical predictions for a system with tensile stress sensitivity.
- 535 2. Theoretical establishment that CCCs form along a scaffolding of underlying paths of aligned  
536 tensile stress and predominantly grow along the anterior-posterior axis due to anisotropic  
537 mechanical stresses.
- 538 3. Temporal development of CCCs often occurs through the formation of disconnected smaller  
539 clusters, lying along the same path of aligned tensile stress, that are later connected into a  
540 single larger chain.
- 541 4. Theoretical results showing that tensile stress sensitivity introduces two robustness mech-  
542 anisms: recovery of cells with reduced contractility through triggering by mechanical stress  
543 feedback and redirection of the path of underlying stress to allow CCCs to circumvent re-  
544 gions of impaired contractility. These theoretical results are supported by our analysis of  
545 experimental perturbations conducted by *Guglielmi et al. (2015)*.

546 We find that the pattern of ratcheted apical constrictions follow the predictions of the AGF  
547 model: cells undergo apical constrictions along tensile stress lines oriented along the anteroposte-  
548 rior axis rather than a purely nearest neighbor mechanical interaction (*Figure 15*). These results  
549 suggest that the ratcheted apical constrictions of the slow phase of VFF are part of a higher order  
550 of organization spanning the entire VF primordium rather than a cellular constriction system based  
551 on initial seeds of constriction that initiate nearest neighbor constriction interactions.

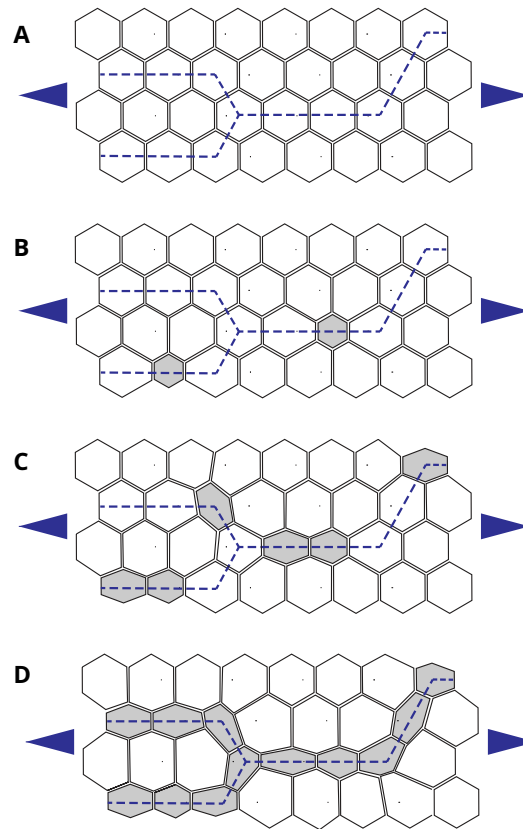

**Figure 15. Model for tensile stress-propagated apical constrictions in the early ventral furrow primordium.** (A) The specified VF primordium is a mechanically active tissue under regional tensile stress from the adjacent anterior and posterior ends containing constricted cells (arrowheads, blue). Example lines of tensile stress (dashed lines, blue) in the tissue before apical constrictions begin. (B) Early ratcheted apical constrictions (gray) are distributed along the lines of tensile stress, but do not appear connected. (C) A later timepoint showing more apical constrictions (gray) forming along the lines of tensile stress. (D) The VF primordium before the fast phase of rapid apical constrictions initiated by the Fog and T48 signaling pathways. Apical constrictions are visible in chains (CCCs).

552 Our theoretical studies showed that tensile stress through the mesoderm primordium at the  
553 end of the slow apical constriction phase is primarily carried by the network of CCCs. Moreover, the  
554 regions of unconstricted cells between CCCs generally form areas of low stress (as shown by the  
555 stress distribution depicted in *Figure 8*). We expect that the reduced cellular stress is conducive for  
556 the later Fog and T48 signaling-mediated rapid constriction of the VF placode preceding invagination.  
557 It is possible that the unconstricted cells in the low stress pockets are able to constrict with less  
558 resistance and at a lower energy cost, as compared with one in an uncorrelated system with no  
559 mechanical feedback. Further support for our contention that tensile stress is oriented along the  
560 CCCs comes from the observation that CCCs can still propagate across VF primordium regions of  
561 experimentally reduced actomyosin contractility in accordance with the predictions of our model.

562 It is likely that the formation of a network of CCCs carrying strong tensile stress oriented along  
563 the anterior-posterior axis provides a useful mechanical coupling between different sections of the  
564 forming furrow. We anticipate that such a coupling is essential for achieving a uniform invagination  
565 when the cell layer buckles inwards, because distortions that may form along the furrow are evened  
566 out by the forces associated with the tensile stress. This mechanism is analogous to the one by  
567 which a deformed ribbon is straightened out when pulled by its ends. We further propose that  
568 mechanical feedback serves to increase robustness of the apical constriction process involved in

569 initializing VF invagination. The above discussion indicates that CCC morphology and the associated  
570 stress distribution, both aided by mechanical feedback during the initial slow phase of apical  
571 constrictions, play an important role in achieving well organized and robust VFF. The robustness  
572 of the process in response to experimental perturbation has been shown in both the work of  
573 *Guglielmi et al. (2015)*, our analysis of it, and in other recent reports (*Chanet et al., 2017; Yevick*  
574 *et al., 2019*). Mechanical processes that are involved in subsequent stages of VFF will be the subject  
575 of future studies.

576 Other morphogenetic phenomena are likely mechanically coordinated in similar ways. Cell  
577 intercalation can act to simultaneously narrow a tissue in one dimension and lengthen it in another.  
578 During *Drosophila* germband extension, cells intercalate through polarized actomyosin contraction  
579 and subsequent cellular interface shortening to exchange neighboring cells either in a single  
580 cell-single cell intercalation or in multicellular interactions through the formation of polarized  
581 supracellular actomyosin cables (*Bertet et al., 2004; Zallen and Wieschaus, 2004; Blankenship*  
582 *et al., 2006; Clément et al., 2017*). Some vertebrate embryonic tissues also undergo convergent  
583 extension involving pulsed actomyosin contractions (*Keller et al., 2008; Skoglund et al., 2008; Rolo*  
584 *et al., 2009; Zhou et al., 2009*). Like VFF apical constrictions, convergent extension might be  
585 coordinated by mechanical interactions.

586 In another embryonic process in *Drosophila*, dorsal closure, epidermal tissue spreads over  
587 another tissue. This process involves apical constriction of the cells of the underlying amnioserosa  
588 in addition to the contraction of a supracellular actomyosin cable in the spreading tissue, in addition  
589 to other mechanisms (*Martin, 2010*). The amnioserosa is under tension and cells undergo apical  
590 constrictions associated with pulsatile actomyosin contractions (*Ma et al., 2009; Solon et al., 2009;*  
591 *Franke et al., 2005*).

592 Tissue level tension has been shown to affect the orientation of mitosis in cell division. This has  
593 been observed in certain groups of cells dividing in the extending germband (*Wang et al., 2017*).  
594 Tension caused by supracellular actomyosin cables along the *Drosophila* embryonic parasegmental  
595 compartment boundaries orients cell division polarity (*Scarpa et al., 2018*). Likewise, tension  
596 generated by actomyosin contractility overrides the general tendency for cell division primarily  
597 along the axis of tissue elongation was observed in the follicle cells surrounding the oocyte (*Finegan*  
598 *et al., 2019*). Beyond a direct effect on the mechanical aspects of morphogenetic processes,  
599 mechanical deformation and mechanical feedback can regulate gene expression. This has been  
600 clearly demonstrated in ventral furrow formation and there is also evidence of the involvement of  
601 mechanical feedback mechanisms in a variety of other organisms (*Farge, 2003; Pouille et al., 2009;*  
602 *Eroshkin and Zaráisky, 2017*).

## 603 **Methods**

### 604 **Experimental methods**

#### 605 Immunofluorescence imaging

606 *Drosophila melanogaster* embryos were fixed using the heat/methanol protocol (*Miller et al., 1989*).  
607 Fixed embryos were stained with mouse anti-Nrt (1:10, Developmental Studies Hybridoma Bank,  
608 DSHB), rabbit anti-Zip (*Chougule et al., 2016*) and Hoechst dye. Secondary antibodies used were  
609 goat anti-mouse Alexa Fluor 488 (Invitrogen) and goat anti-rabbit Alexa Fluor 546 (Invitrogen).  
610 Embryos were mounted in Aquapolymount (Polysciences). Embryos imaged in the mid-sagittal  
611 plane were manually oriented (*Spencer et al., 2015*), and embryos imaged in cross-section were  
612 manually sectioned (*Thomas and Wieschaus, 2004*). Imaging was performed with a Nikon Ti-E  
613 microscope with an A1 confocal system.

#### 614 Acquiring images of live embryos

615 Flies and embryos were cultured at 22.5°C. Embryos carrying the *Spider-GFP* transgene (*Morin et al.,*  
616 *2001*) were used to visualize the plasma membrane and cells shape. Embryos were prepared as

617 described previously (*Gao et al., 2016; Martin et al., 2009; Cavey and Lecuit, 2008; Spencer et al.,*  
618 *2015*). Embryos were hand-selected for the optimum stage (early stage 5 (*Wieschaus and Nüsslein-*  
619 *Volhard, 1998*)) of development in halocarbon oil 27 (Sigma). The oil was removed by moving the  
620 embryos onto agar and then mounting them with glue in embryo chambers designed to avoid  
621 compression artifacts (*Gao et al., 2016*). The ventral sides of the embryos were imaged using a 40x  
622 oil objective (NA 1.3) of a Nikon Ti-E microscope with an A1 confocal system using a pinhole size of  
623 1.6 AU and 4x averaging. Images were collected in three planes separated by 1  $\mu\text{m}$ , at 15 second  
624 intervals.

## 625 Image processing

626 The following procedure is used to generate the processed confocal microscopy images presented  
627 and analyzed in this article. Time lapses of live embryos are loaded into the Embryo Development  
628 Geometry Explorer (EDGE) software package for segmentation and tracking (*Gelbart et al., 2012*).  
629 EDGE uses a combination of MATLAB routines to distinguish cellular membranes and then identifies  
630 cells by drawing an overlay to segment individual frames. This segmentation is an automated  
631 process based on user entered variables; however, corrections of the resulting overlay are often  
632 necessary and must be done manually. Cells are then tracked using polygon matching by comparing  
633 relative centroid location and fractional area overlap between images.

634 After segmentation and tracking have been completed, data is extracted from EDGE in the form  
635 of matrices that map the pixels of each frame to individual cells. These pixel matrices are used to  
636 identify and tag constricted cells. Tracked cells are marked as constricted based on their minor  
637 axis length (MAL) reduction relative to their reference MAL, see *Equation 1*. MALs are calculated  
638 from the pixel matrices by solving for the eigenvalues of each cell's second moment matrix. Second  
639 moment matrix of cell  $i$  is defined by,

$$\mathbf{M}_i = \sum_j \begin{bmatrix} (p_{xj} - r_x)^2 & (p_{xj} - r_x)(p_{yj} - r_y) \\ (p_{xj} - r_x)(p_{yj} - r_y) & (p_{yj} - r_y)^2 \end{bmatrix}, \quad (9)$$

640 where  $(p_{xj}, p_{yj})$  are indices of pixel  $j$  contained in the discrete array of pixels that describes cell  $i$ ,  
641 and  $(r_x, r_y)$  are the indices of the pixel which corresponds with cell  $i$ 's centroid. These eigenvalues  
642 effectively define the length of major and minor axes as though cellular geometries were projected  
643 onto an ellipse. Cell specific reference MALs are established by averaging MAL measurements over  
644 15 to 20 sequential frames prior to the onset of apical constrictions. Time zero is then selected  
645 as the first frame in a given time lapse that has a cell which remains constricted across multiple  
646 subsequent frames when a MAL reduction of 65% is implemented.

647 The pixel matrices are also used to generate the cellular neighbor list necessary for identifying  
648 clusters. Cells are identified as adjacent neighbors through an iterative process where each pixel of  
649 a given cell is checked to see if it is a primary or secondary neighbor to the pixel of any other cell. A  
650 list of constricted cell clusters for each frame is then generated by scanning the neighbor list to  
651 discern whether constricted cells are adjacent neighbors to any other constricted cells. The list of  
652 clusters allows for statistical measures such as total number of clusters and sizes of clusters to be  
653 monitored.

## 654 Identification of active cells

655 To compare  $C_{\text{avg}}$  vs  $\%N_c$  of live embryos to our model, we normalize  $C_{\text{avg}}$  by the number of active  
656 cells observed. We identify the number of active cells captured in our experimental images by  
657 counting all cells across a given time lapse that experience a MAL that is 85% of their reference MAL  
658 or lower.

## 659 Theoretical AGF model

### 660 Simulation domain

661 In our coarse-grained approach the entire apical cell ends are represented as 2D mechanically  
662 coupled stress-responsive active particles that are capable of random constrictions, as described in



663 the Results section. The curvature of the cellular layer is neglected, and the region of interest is  
664 represented as a planar domain (see Fig. **Figure 4**). To accurately represent the relevant domain of  
665 the embryo our full-scale simulations are performed in a square domain with 6,400 closely packed  
666 particles. This particle number approximately equals the number of cells in the *Drosophila* embryo  
667 during the VFF process.

#### 668 Boundary conditions

669 We use the periodic boundary conditions both in the horizontal (anteroposterior) and vertical  
670 (dorsoventral) directions  $x$  and  $y$ . The periodicity in the dorsoventral direction  $y$  reflects the ap-  
671 proximately cylindrical shape of the embryo. The embryo has anterior and posterior end-caps  
672 that are relatively immobile throughout this process. We use the periodic boundary condition in  
673 the anteroposterior direction  $x$  to approximate the relatively rigid boundary of the end caps while  
674 avoiding complexities associated with implementing specific boundary conditions for each cap.

#### 675 Implicit mesoderm representation

676 To lower the numerical cost we also use the system with reduced number of inactive cells, in which  
677 only a portion of the inactive lateral region is modeled explicitly. The effect of the remaining inactive  
678 cells on the behavior of the system is approximated by elastic springs acting upon the cells at  
679 the border of the explicit domain (see Fig. **Figure 4D**). The spring constant matches the elastic  
680 properties of the replaced lateral domain, determined from full simulations of the entire system of  
681 6,400 cells.

#### 682 Particle-size distribution

683 To mimic polydispersity of *Drosophila* cells, the system in the initial state (i.e., before the cell  
684 constrictions occur) is a disordered 50%–50% mechanically stable mixture of particles with the  
685 diameter ratio  $r = 1.1$  (**Gao et al., 2006**). The attractive interactions described by **Equation 3** act only  
686 between connected adjacent particles. Since cell intercalation does not occur during the slow phase  
687 of VFF, the list of connected neighbors is determined in the initial state using a center-to-center  
688 distance criterion, and the list remains unchanged throughout the simulation.

689 We note that the cell shapes are not explicitly represented in the AGF model. The disk diameter  
690 corresponds to the size of a cell in mechanical equilibrium in the absence of mechanical forces ex-  
691 erted by the surrounding cells. The actual cell dimensions in the presence of tensile or compressive  
692 forces can be approximately inferred from the extension of the springs that connect a given disk to  
693 other disks.

#### 694 Evaluation of the viral stress

695 The dimensionless virial stress tensor associated with the forces acting on particle  $i$  is evaluated  
696 from the standard expression

$$S_{\alpha\beta}(i) = -\frac{1}{2e} \sum_{j \neq i} r_{ij\alpha} f_{ij\beta}, \quad (10)$$

697 where  $\alpha, \beta = x, y$ ,  $r_{ij\alpha} = r_{i\alpha} - r_{j\alpha}$  is the  $\alpha$  component of the relative position of particles  $i$  and  $j$ ,  $f_{ij\beta}$   
698 is the  $\beta$  component of the force exerted by particle  $j$  on particle  $i$ , and the summation is over the  
699 interacting neighbors. The stress tensor defined by **Equation 10** is symmetric, because the particles  
700 are torque-free. The major (minor) stress is the eigenvalue of the stress tensor with the larger  
701 (smaller) magnitude, and the major (minor) axis is the direction of the corresponding eigenvector.

#### 702 Acknowledgements

703 We would like to show our gratitude to Stefano De Renzis, Ph.D. for sharing confocal microscopy  
704 images of optogenetically perturbed embryos. We would also like to thank Hannah G. Yevick, Ph.D.  
705 for useful discussions at the 2018 APS March Meeting. J.B. was partially supported by NSF Grant  
706 CBET 1603627. J.H.T. received support from the South Plains Foundation.

## References

- 707 **Bertet C**, Sulak L, Lecuit T. Myosin-dependent junction remodelling controls planar cell intercalation and axis  
708 elongation. *Nature*. 2004; 429(6992):667–671.
- 710 **Blankenship JT**, Backovic ST, Sanny JSP, Weitz O, Zallen JA. Multicellular rosette formation links planar cell  
711 polarity to tissue morphogenesis. *Dev Cell*. 2006; 11(4):459–470.
- 712 **Brouzés E**, Farge E. Interplay of mechanical deformation and patterned gene expression in developing embryos.  
713 *Curr Opin Genet Dev*. 2004; 14:367–374.
- 714 **Cavey M**, Lecuit T. Imaging cellular and molecular dynamics in live embryos using fluorescent proteins, vol. 420  
715 of *Methods in Molecular Biology*. Totowa, NJ: Humana Press Inc.; 2008.
- 716 **Chanet S**, Martin AC. Mechanical Force Sensing in Tissues. In: Engler, A J and Kumar, S, editor. *Mechanotrans-*  
717 *duction*, vol. 126 of *Progress in Molecular Biology and Translational Science Elsevier*; 2014.p. 317–352.
- 718 **Chanet S**, Miller CJ, Vaishnav ED, Ermentrout B, Davidson LA, Martin AC. Actomyosin meshwork mechanosensing  
719 enables tissue shape to orient cell force. *Nat Commun*. 2017; 8:15014.
- 720 **Chougule AB**, Hastert MC, Thomas JH. Drak Is Required for Actomyosin Organization During Drosophila  
721 Cellularization. *G3 (Bethesda)*. 2016; 6(4):819–828.
- 722 **Clément R**, Dehapiot B, Collinet C, Lecuit T, Lenne PF. Viscoelastic Dissipation Stabilizes Cell Shape Changes  
723 during Tissue Morphogenesis. *Curr Biol*. 2017; 27(20):3132–3142.
- 724 **van Eeden F**, St Johnston D. The polarisation of the anterior-posterior and dorsal-ventral axes during Drosophila  
725 oogenesis. *Curr Opin Genet Dev*. 1999; 9:396–404.
- 726 **Eroshkin FM**, Zaraisky AG. Mechano-sensitive regulation of gene expression during the embryonic development.  
727 *Genesis*. 2017; 55(4):e23026.
- 728 **Farge E**. Mechanical induction of twist in the Drosophila foregut/stomodaeal primordium. *Curr Biol*. 2003;  
729 13(16):1365–1377.
- 730 **Farhadifar R**, Roper JC, Algouy B, Eaton S, Juelicher F. The influence of cell mechanics, cell-cell interactions,  
731 and proliferation on epithelial packing. *Curr Biol*. 2007; 17(24):2095–2104.
- 732 **Finegan TM**, Na D, Cammarota C, Skeeters AV, Nádasi TJ, Dawney NS, Fletcher AG, Oakes PW, Bergstralh DT.  
733 Tissue tension and not interphase cell shape determines cell division orientation in the Drosophila follicular  
734 epithelium. *EMBO J*. 2019; 38(3):e100072.
- 735 **Franke JD**, Montague RA, Kiehart DP. Nonmuscle myosin II generates forces that transmit tension and drive  
736 contraction in multiple tissues during dorsal closure. *Curr Biol*. 2005; 15(24):2208–2221.
- 737 **Gao GJ**, Blawdziewicz J, O'Hern CS. Frequency distribution of mechanically stable disk packings. *Phys Rev E*.  
738 2006; 74(6, 1):061304.
- 739 **Gao GJJ**, Holcomb MC, Thomas JH, Blawdziewicz J. Embryo as an active granular fluid: stress-coordinated  
740 cellular constriction chains. *J Phys Condens Matter*. 2016; 28(41):414021.
- 741 **Gelbart MA**, He B, Martin AC, Thiberge SY, Wieschaus EF, Kaschube M. Volume conservation principle involved  
742 in cell lengthening and nucleus movement during tissue morphogenesis. *PNAS*. 2012; 109(47):19298–19303.
- 743 **Gilmour D**, Rembold M, Leptin M. From morphogen to morphogenesis and back. *Nature*. 2017; 541(7637):311–  
744 320.
- 745 **Guglielmi G**, Barry JD, Huber W, De Renzis S. An Optogenetic Method to Modulate Cell Contractility during  
746 Tissue Morphogenesis. *Dev Cell*. 2015; 35(5):646–660.
- 747 **Heer NC**, Martin AC. Tension, contraction and tissue morphogenesis. *Development*. 2017; 144(23):4249–4260.
- 748 **Heer NC**, Miller PW, Chanet S, Stroop N, Dunkel J, Martin AC. Actomyosin-based tissue folding requires a  
749 multicellular myosin gradient. *Development*. 2017; 144(10):1876–1886.
- 750 **Hufnagel L**, Teleman AA, Rouault H, Cohen SM, Shraiman BI. On the mechanism of wing size determination in  
751 fly development. *PNAS*. 2007; 104(10):3835–3840.

- 752 **Hunter MV**, Fernandez-Gonzalez R. Coordinating cell movements in vivo: junctional and cytoskeletal dynamics  
753 lead the way. *Curr Opin Cell Biol.* 2017; 48:54–62.
- 754 **Huynh JR**, St Johnston D. The Origin of Asymmetry: Early Polarisation of Drosophila Germline Cyst and Oocyte.  
755 *Curr Biol.* 2004; 14:R438–R449.
- 756 **Ip YT**, Maggert K, Levine M. Uncoupling gastrulation and mesoderm differentiation in the Drosophila embryo.  
757 *EMBO J.* 1994; 13(24):5826–5834.
- 758 **Keller R**, Shook D, Skoglund P. The forces that shape embryos: physical aspects of convergent extension by cell  
759 intercalation. *Phys Biol.* 2008; 5(1):015007.
- 760 **Kondic L**, Gouillet A, O'Hern CS, Kramar M, Mischaikow K, Behringer RP. Topology of force networks in com-  
761 pressed granular media. *EPL.* 2012; 97(5):54001.
- 762 **Krajcovic MM**, Minden JS. Assessing the Critical Period for Rho Kinase Activity During Drosophila Ventral Furrow  
763 Formation. *Dev Dyn.* 2012; 241(1):1729–1743.
- 764 **Ladoux B**, Mége RM. Mechanobiology of collective cell behaviours. *Nat Rev Mol Cell Biol.* 2017; 18(12):743–757.
- 765 **Leptin M**. twist and snail as positive and negative regulators during Drosophila mesoderm development. *Genes*  
766 *Dev.* 1991; 5(9):1568–1576.
- 767 **Leptin M**. Gastrulation in Drosophila: the logic and the cellular mechanisms. *EMBO J.* 1999; 18(10):3187–3192.
- 768 **Leptin M**, Grunewald B. Cell-Shape Changes During Gastrulation in Drosophila. *Development.* 1990; 110(1):73–  
769 84.
- 770 **Ma X**, Lynch HE, Scully PC, Hutson MS. Probing embryonic tissue mechanics with laser hole drilling. *Phys Biol.*  
771 2009; 6(3):036004.
- 772 **Mamamoto T**, Ingber DE. Mechanical control of tissue and organ development. *Development.* 2010; 137(9):1407–  
773 1420.
- 774 **Martin AC**. Pulsation and stabilization: contractile forces that underlie morphogenesis. *Dev Biol.* 2010;  
775 341(1):114–125.
- 776 **Martin AC**, Gelbart M, Fernandez-Gonzalez R, Kaschube M, Wieschaus EF. Integration of contractile forces  
777 during tissue invagination. *J Cell Biol.* 2010; 188(5):735–749.
- 778 **Martin AC**, Kaschube M, Wieschaus EF. Pulsed contractions of an actin-myosin network drive apical constriction.  
779 *Nature.* 2009; 457(7228):495–499.
- 780 **Miller CJ**, Davidson LA. The interplay between cell signalling and mechanics in developmental processes. *Nat*  
781 *Rev Genet.* 2013; 14(10):733–744.
- 782 **Miller KG**, Field CM, Alberts BM. Actin-binding proteins from Drosophila embryos: a complex network of  
783 interacting proteins detected by F-actin affinity chromatography. *J Cell Biol.* 1989; 109(6 Pt 1):2963–2975.
- 784 **Mitrossilis D**, Röper JC, Le Roy D, Driquez B, Michel A, Ménager C, Shaw G, Le Denmat S, Ranno L, Dumas-  
785 Bouchiat F, Dempsey NM, Farge E. Mechanotransductive Cascade of Myo-II-Dependent Mesoderm and  
786 Endoderm Invaginations in Embryo Gastrulation. *Nat Commun.* 2017; 8:14188.
- 787 **Morin X**, Daneman R, Zavortink M, Chia W. A protein trap strategy to detect GFP-tagged proteins expressed  
788 from their endogenous loci in Drosophila. *PNAS.* 2001; 98(26):15050–15055.
- 789 **Pouille PA**, Ahmadi P, Brunet AC, Farge E. Mechanical Signals Trigger Myosin II Redistribution and Mesoderm  
790 Invagination in Drosophila Embryos. *Sci Signal.* 2009; 2(66):ra16.
- 791 **Riechmann V**, Ephrussi A. Axis formation during Drosophila oogenesis. *Curr Opin Genet Dev.* 2001; 11:374–383.
- 792 **Rolo A**, Skoglund P, Keller R. Morphogenetic movements driving neural tube closure in Xenopus require myosin  
793 IIB. *Dev Biol.* 2009; 327(2):327–338.
- 794 **Scarpa E**, Finet C, Blanchard GB, Sanson B. Actomyosin-Driven Tension at Compartmental Boundaries Orients  
795 Cell Division Independently of Cell Geometry In Vivo. *Dev Cell.* 2018; 47(6):727–740.

- 796 **Seher TC**, Narasimha M, Vogelsang E, Leptin M. Analysis and reconstitution of the genetic cascade controlling  
797 early mesoderm morphogenesis in the *Drosophila* embryo. *Mech Dev.* 2007; 124(3):167–179.
- 798 **Skoglund P**, Rolo A, Chen X, Gumbiner BM, Keller R. Convergence and extension at gastrulation require a  
799 myosin IIB-dependent cortical actin network. *Development.* 2008; 135(14):2435–2444.
- 800 **Solon J**, Kaya-Copur A, Colombelli J, Brunner D. Pulsed forces timed by a ratchet-like mechanism drive directed  
801 tissue movement during dorsal closure. *Cell.* 2009; 137(7):1331–1342.
- 802 **Spencer AK**, Siddiqui BA, Thomas JH. Cell shape change and invagination of the cephalic furrow involves  
803 reorganization of F-actin. *Dev Biol.* 2015; 402:192–207.
- 804 **St Johnston D**, Nüsslein-Volhard C. The Origin of Pattern and Polarity in the *Drosophila* Embryo. *Cell.* 1992;  
805 68:201–219.
- 806 **Sweeton D**, Parks S, Costa M, Wieschaus E. Gastrulation in *Drosophila*: the formation of the ventral furrow and  
807 posterior midgut invaginations. *Development.* 1991; 112:775–789.
- 808 **Thomas JH**, Wieschaus E. *src64* and *tec29* are required for microfilament contraction during *Drosophila*  
809 cellularization. *Development.* 2004; 131(4):863–871.
- 810 **Tordesillas A**, Tobin ST, Cil M, Alshibli K, Behringer RP. Network flow model of force transmission in unbonded  
811 and bonded granular media. *Phys Rev E: Stat Nonlinear Soft Matter Phys.* 2015; 91(6):062204.
- 812 **Wang MF**, Hunter MV, Wang G, McFaul C, Yip CM, Fernandez-Gonzalez R. Automated cell tracking identifies  
813 mechanically oriented cell divisions during *Drosophila* axis elongation. *Development.* 2017; 144(7):1350–1361.
- 814 **Weng M**, Wieschaus E. Myosin-dependent remodeling of adherens junctions protects junctions from Snail-  
815 dependent disassembly. *J Cell Biol.* 2016; 212(2):219–229.
- 816 **Wieschaus EP**, Nüsslein-Volhard C. Looking at embryos. In: Roberts DB, editor. *Drosophila: A Practical Approach*,  
817 2 ed. Oxford, England: Oxford University Press; 1998.p. 179–214.
- 818 **Xie S**, Martin AC. Intracellular signalling and intercellular coupling coordinate heterogeneous contractile events  
819 to facilitate tissue folding. *Nat Commun.* 2015; 6:7161.
- 820 **Yevick HG**, Pearson WM, Dunkel J, Martin AC. Structural Redundancy in Supracellular Actomyosin Networks  
821 Enables Robust Tissue Folding. *Dev Cell.* 2019; doi: [10.1016/j.devcel.2019.06.015](https://doi.org/10.1016/j.devcel.2019.06.015).
- 822 **Zallen JA**, Wieschaus E. Patterned gene expression directs bipolar planar polarity in *Drosophila*. *Dev Cell.* 2004;  
823 6(3):343–355.
- 824 **Zhang H**, Labouesse M. Signalling through mechanical inputs - a coordinated process. *J Cell Sci.* 2012;  
825 125(13):3039–3049.
- 826 **Zhou J**, Kim HY, Davidson LA. Actomyosin stiffens the vertebrate embryo during crucial stages of elongation  
827 and neural tube closure. *Development.* 2009; 136(4):677–688.
